# Supplementary material for: Glycosylation intermediates studied using low temperature1H- and19F-DOSY NMR: new insight into the activation of trichloroacetimidates
Source: Royal Society of Chemistry journal article supplement (doi:10.1039/c6cc05272j), 2016-01-01
Supplement: c6cc05272j1.pdf [file c6cc05272j1.pdf]

## Supporting Information

Glycosylation Intermediates Studied by Low Temperature  $^1\text{H}$ - and  $^{19}\text{F}$ -DOSY NMR:  
New Insight into the Activation of Trichloroacetimidates.

Yan Qiao,<sup>[b,c]</sup> Wenzhi Ge,<sup>[b]</sup> Lingyu Jia,<sup>[c]</sup> Xianglin Hou,<sup>[c]</sup> Yingxiong Wang <sup>\*[c]</sup> and Christian  
Marcus Pedersen<sup>\*[a]</sup>

## Electronic Supplementary Information

### Table of Contents

|                                                                                                                                                                                                                                                                                                                               |    |
|-------------------------------------------------------------------------------------------------------------------------------------------------------------------------------------------------------------------------------------------------------------------------------------------------------------------------------|----|
| S1. Materials and methods.....                                                                                                                                                                                                                                                                                                | 4  |
| S2. Spectra of donor 1 (2-O-benzyl-3,4,6-tri-O-acetyl $\alpha$ -D-glucopyranosyl trichloroacetimidate)<br>.....                                                                                                                                                                                                               | 7  |
| Figure S1. $^1\text{H}$ NMR spectrum of donor.....                                                                                                                                                                                                                                                                            | 7  |
| Figure S2. $^{13}\text{C}$ DEPT135 spectrum of donor <b>1</b> .....                                                                                                                                                                                                                                                           | 8  |
| Figure S3. $^{13}\text{C}$ NMR spectrum of donor <b>1</b> .....                                                                                                                                                                                                                                                               | 9  |
| Figure S4. COSY spectrum of donor <b>1</b> .....                                                                                                                                                                                                                                                                              | 10 |
| Figure S5. HSQC spectrum of donor <b>1</b> .....                                                                                                                                                                                                                                                                              | 11 |
| S3. Decomposition studies of donor 1 with TMSOTf.....                                                                                                                                                                                                                                                                         | 12 |
| Figure S6. $^1\text{H}$ NMR spectrum of glycosylation reactions catalyzed by TMSOTf at $-55\text{ }^\circ\text{C}$ ....                                                                                                                                                                                                       | 12 |
| Figure S7. COSY spectrum of glycosylation reactions catalyzed by TMSOTf at $-55\text{ }^\circ\text{C}$ .....                                                                                                                                                                                                                  | 13 |
| Figure S8. $^{13}\text{C}$ DEPT135 spectrum of glycosylation reactions catalyzed by TMSOTf at $-55\text{ }^\circ\text{C}$<br>.....                                                                                                                                                                                            | 14 |
| Figure S9. HSQC spectrum of glycosylation reactions catalyzed by TMSOTf at $-55\text{ }^\circ\text{C}$ .....                                                                                                                                                                                                                  | 15 |
| Figure S10. $^{13}\text{C}$ NMR spectrum of glycosylation reactions catalyzed by TMSOTf at $-55\text{ }^\circ\text{C}$ ..                                                                                                                                                                                                     | 16 |
| Figure S11. $^1\text{H}$ DOSY and $^{19}\text{F}$ DOSY spectra of glycosylation reactions catalyzed by TMSOTf<br>at $-55\text{ }^\circ\text{C}$ .....                                                                                                                                                                         | 16 |
| Figure S12. $^1\text{H}$ NMR spectra of glycosylation reactions catalyzed by TMSOTf from $-55\text{ }^\circ\text{C}$ to<br>$5\text{ }^\circ\text{C}$ .....                                                                                                                                                                    | 18 |
| S4. Decomposition studies of donor with $\text{BF}_3\cdot\text{OEt}_2$ .....                                                                                                                                                                                                                                                  | 19 |
| Figure S13. $^1\text{H}$ NMR spectrum of glycosylation reactions catalyzed by $\text{BF}_3\cdot\text{OEt}_2$ at $-55\text{ }^\circ\text{C}$ ..                                                                                                                                                                                | 19 |
| Figure S14. $^{19}\text{F}$ NMR spectrum of glycosylation reactions catalyzed by $\text{BF}_3\cdot\text{OEt}_2$ at $-55\text{ }^\circ\text{C}$ .                                                                                                                                                                              | 20 |
| Figure S15. HSQC spectrum of glycosylation reactions catalyzed by $\text{BF}_3\cdot\text{OEt}_2$ at $-55\text{ }^\circ\text{C}$ .....                                                                                                                                                                                         | 21 |
| Figure S16. $^{13}\text{C}$ NMR spectrum of glycosylation reactions catalyzed by $\text{BF}_3\cdot\text{OEt}_2$ at $-55\text{ }^\circ\text{C}$ ..                                                                                                                                                                             | 22 |
| Figure S17. $^{11}\text{B}$ NMR spectrum of glycosylation reactions catalyzed by $\text{BF}_3\cdot\text{OEt}_2$ at $-55\text{ }^\circ\text{C}$ .<br>Using the chemical shift of the $\text{BF}_3\cdot\text{OEt}_2$ as a reference (0 ppm). The peak at $-1.21\text{ ppm}$ is<br>characteristic for a B-O or B-N complex. .... | 23 |
| Figure S18. $^1\text{H}$ DOSY and $^{19}\text{F}$ DOSY spectra of glycosylation reactions catalyzed by $\text{BF}_3\cdot\text{OEt}_2$<br>at $-55\text{ }^\circ\text{C}$ .....                                                                                                                                                 | 24 |

|                                                                                                                                                          |    |
|----------------------------------------------------------------------------------------------------------------------------------------------------------|----|
| Figure S19. <sup>1</sup> H NMR spectra of glycosylation reactions catalyzed by BF <sub>3</sub> ·OEt <sub>2</sub> from -55 °C to -15 °C .....             | 25 |
| Figure S20. COSY spectrum of glycosylation reactions catalyzed by BF <sub>3</sub> ·OEt <sub>2</sub> at -15 °C .....                                      | 26 |
| Figure S21. <sup>13</sup> C DEPT135 spectrum of glycosylation reactions catalyzed by BF <sub>3</sub> ·OEt <sub>2</sub> at -15 °C .....                   | 27 |
| Figure S22. HSQC spectrum of glycosylation reactions catalyzed by BF <sub>3</sub> ·OEt <sub>2</sub> at -15 °C.....                                       | 28 |
| Figure S23. <sup>19</sup> F NMR spectrum of glycosylation reactions catalyzed by BF <sub>3</sub> ·OEt <sub>2</sub> at -15 °C .....                       | 29 |
| Figure S24. <sup>1</sup> H NMR spectra of glycosylation reactions catalyzed by BF <sub>3</sub> ·OEt <sub>2</sub> at -15 °C and recooling to -55 °C ..... | 30 |
| S5. Decomposition studies of donor with TMSNTf <sub>2</sub> .....                                                                                        | 31 |
| Figure S25. <sup>1</sup> H NMR spectra of TMSNTf <sub>2</sub> in CD <sub>2</sub> Cl <sub>2</sub> at -55 °C .....                                         | 31 |
| Figure S26. <sup>19</sup> F NMR spectra of TMSNTf <sub>2</sub> in CD <sub>2</sub> Cl <sub>2</sub> at -55 °C .....                                        | 32 |
| Figure S27. <sup>1</sup> H NMR spectra of glycosylation reactions catalyzed by TMSNTf <sub>2</sub> from 0 min to 30 min at -55 °C .....                  | 33 |
| Figure S28. <sup>1</sup> H NMR spectrum of glycosylation reactions catalyzed by TMSNTf <sub>2</sub> at -55 °C .....                                      | 34 |
| Figure S29. COSY spectrum of glycosylation reactions catalyzed by TMSNTf <sub>2</sub> at -55 °C.....                                                     | 35 |
| Figure S30. <sup>13</sup> C DEPT135 spectrum of glycosylation reactions catalyzed by TMSNTf <sub>2</sub> at -55 °C .....                                 | 36 |
| Figure S31. HSQC spectrum of glycosylation reactions catalyzed by TMSNTf <sub>2</sub> at -55 °C.....                                                     | 37 |
| Figure S32. <sup>19</sup> F NMR spectrum of glycosylation reactions catalyzed by TMSNTf <sub>2</sub> at -55 °C.....                                      | 38 |
| Figure S33. NOESY spectrum of glycosylation reactions catalyzed by TMSNTf <sub>2</sub> at -55 °C .....                                                   | 39 |
| Figure S34. <sup>1</sup> H DOSY and <sup>19</sup> F DOSY spectra of glycosylation reactions catalyzed by TMSNTf <sub>2</sub> .....                       | 40 |
| Figure S35. <sup>19</sup> F NMR spectra of glycosylation reactions catalyzed by TMSNTf <sub>2</sub> from -55 °C to 15 °C .....                           | 41 |
| Figure S36. COSY spectrum of glycosylation reactions catalyzed by TMSNTf <sub>2</sub> at -5 °C.....                                                      | 42 |
| Figure S37. <sup>13</sup> C NMR spectrum of glycosylation reactions catalyzed by TMSNTf <sub>2</sub> at -5 °C .....                                      | 43 |
| Figure S38. HSQC spectrum of glycosylation reactions catalyzed by TMSNTf <sub>2</sub> at -5 °C.....                                                      | 44 |
| 6. Molecular Weight Determination of the intermediates via DOSY by using External Calibration Curves .....                                               | 45 |
| Figure S39. Overview of the used compounds (S1-S8) for calibration curves and the internal reference.....                                                | 45 |
| Table S2. The compounds for calibration curves by <sup>19</sup> F DOSY NMR and their normalized diffusion coefficients log D <sub>x,norm</sub> .....     | 47 |

Figure S40.  $\log D$  versus  $\log MW$  in  $CD_2Cl_2$  by  $^1H$  DOSY NMR. All compounds were normalized to  $\log D_{ref,fix} = -9.1537$ .....48

Figure S41.  $\log D$  versus  $\log MW$  in  $CD_2Cl_2$  by  $^{19}F$  DOSY NMR. All compounds were normalized to  $\log D_{ref,fix} = -9.1537$ .....48

## S1. Materials and methods

2,3,4,6-Tetra-O-acetyl- $\alpha$ -D-glucopyranosyl fluoride (98%) and  $\alpha$ -D-glucose pentaacetate (98%) were obtained from Aladdin Reagent Company (Shanghai). N-(Trimethylsilyl)bis(trifluoromethanesulfonyl)imide (TMSNTf<sub>2</sub>, 95%) was purchased from Tokyo Chemical Industry Co., Ltd. 1,2,3,4,5,6,7,8-Octafluoro-9,10-bis[4-(trifluoromethyl)phenyl]anthracene (97%) was purchased from Sigma Aldrich. 1,3,5-Tris(trifluoromethyl)benzene (98%), trimethylsilyl trifluoromethanesulfonate (TMSOTf, 99%), boron trifluoride diethyl etherate (BF<sub>3</sub>·OEt<sub>2</sub>, 48% BF<sub>3</sub>), methanol (99.5%), dichloromethane-d<sub>2</sub> (CD<sub>2</sub>Cl<sub>2</sub>, 99.9 atom% D) were supplied by J&K Scientific Ltd. All chemicals were used without further purification.

2-O-benzyl-3,4,6-tri-O-acetyl  $\alpha$ -D-glucopyranosyl trichloroacetimidate **1** was synthesized.<sup>1</sup>

<sup>1</sup>H NMR (400 MHz, CD<sub>2</sub>Cl<sub>2</sub>)  $\delta$  <sup>1</sup>H NMR (500 MHz, Chloroform-*d*)  $\delta$  8.74 (s, 1 H, NH); 7.35-7.28 (m, 5 H, Ar); 6.50 (d, *J* = 3.7 Hz, 1 H, H-1); 5.45 (dd, *J* = 9.7, 10.0 Hz, 1 H, H-3); 5.05 (dd, *J* = 9.7, 10.0 Hz, 1 H, H-4); 4.68 (d, *J* = 12.1 Hz, 1 H, Bn); 4.60 (d, *J* = 12.1 Hz, 1 H, Bn); 4.22-4.15 (m, 2 H, H-5, H-6a); 4.08 (bd, *J* = 10.4 Hz, 1-H, H-6b); 3.80 (dd, *J* = 3.7, 9.7 Hz, 1 H, H-2); 2.02 (s, 3 H, Ac); 2.01 (s, 3 H, Ac); 1.99 (s, 3 H, Ac)

<sup>13</sup>C NMR (100 MHz, CD<sub>2</sub>Cl<sub>2</sub>)  $\delta$  170.9 (Ac), 170.4 (Ac), 170.1 (Ac), 161.4 (C=N), 129.0, 128.6, 128.3, 126.7 (6 C, Ar), 93.9 (C-1), 76.5 (C-2), 73.5 (Bn), 71.9 (C-3), 70.6 (C-5), 68.5 (C-4), 62.1 (C-6), 21.2 (Ac), 21.0 (2xAc).

NMR spectra were acquired on a Bruker AV-III 400 MHz NMR spectrometer (9.39 T), using a 5 mm PABBO BB/19F-1H/D probe with z gradient coil producing a maximum gradient strength of  $0.50 \text{ T m}^{-1}$ . The “doped water ( $\text{GdCl}_3$  in  $\text{D}_2\text{O}$ )” was used as a standard for the gradient strength calibration. The temperature was calibrated using the NMR temperature standards according to the manuals of Bruker (4%  $\text{CH}_3\text{OH}$  in  $\text{CD}_3\text{OD}$  for low temperature).

All used compounds have been measured in 0.04 M solutions of analyte and reference (in an equimolar ratio) in  $400 \mu\text{L}$   $\text{CD}_2\text{Cl}_2$  for NMR measurement.  $^1\text{H}$  NMR was obtained at frequencies of 400.13 MHz;  $^{19}\text{F}$  NMR was obtained at frequencies of 376.47 MHz. Using the chemical shift of the  $\text{CD}_2\text{Cl}_2$  as a reference for  $^1\text{H}$  and  $^{13}\text{C}$  NMR (at 5.32, 54 ppm). Using the chemical shift of 1,3,5-tris(trifluoromethyl)benzene signal (at -60.25 ppm) as the reference for  $^{19}\text{F}$  NMR.<sup>2</sup>

DOSY experiments were performed with the Bruker standard bipolar pulse longitudinal eddy current delay (ledbpgp2s) pulse sequence. All the DOSY measurements were performed at  $-55 \text{ }^\circ\text{C}$  without sample spinning. For each DOSY-NMR experiment, 16 BPPLED spectra with 32K data points were collected. The diffusion time ( $\Delta$ ) was 100 ms. The duration of the pulse field gradient ( $\delta/2$ ) was adjusted in a range of 600~2000  $\mu\text{s}$  in order to obtain 2%~5% residual signal with the maximum gradient strength. The delay for gradient recovery was 0.2 ms and the eddy current delay was 5 ms. The gradient strength was incremented in 16 steps from 2% to 95% of its maximum value in a linear ramp. After Fourier transformation and baseline

correction, the diffusion dimension was processed using Bruker Topspin 3.1 software and the diffusion coefficients were calculated by Dynamics center 2.2.4. The diffusion coefficients of the compounds in  $\text{CD}_2\text{Cl}_2$  were normalized to the 1,3,5-tris(trifluoromethyl)benzene signal with a fixed value of  $\log D_{\text{ref,fix}} = -9.1573$ .

## S2. Spectra of donor 1 (2-O-benzyl-3,4,6-tri-O-acetyl $\alpha$ -D-glucopyranosyl trichloroacetimidate)

Figure S1.  $^1\text{H}$  NMR spectrum of donor

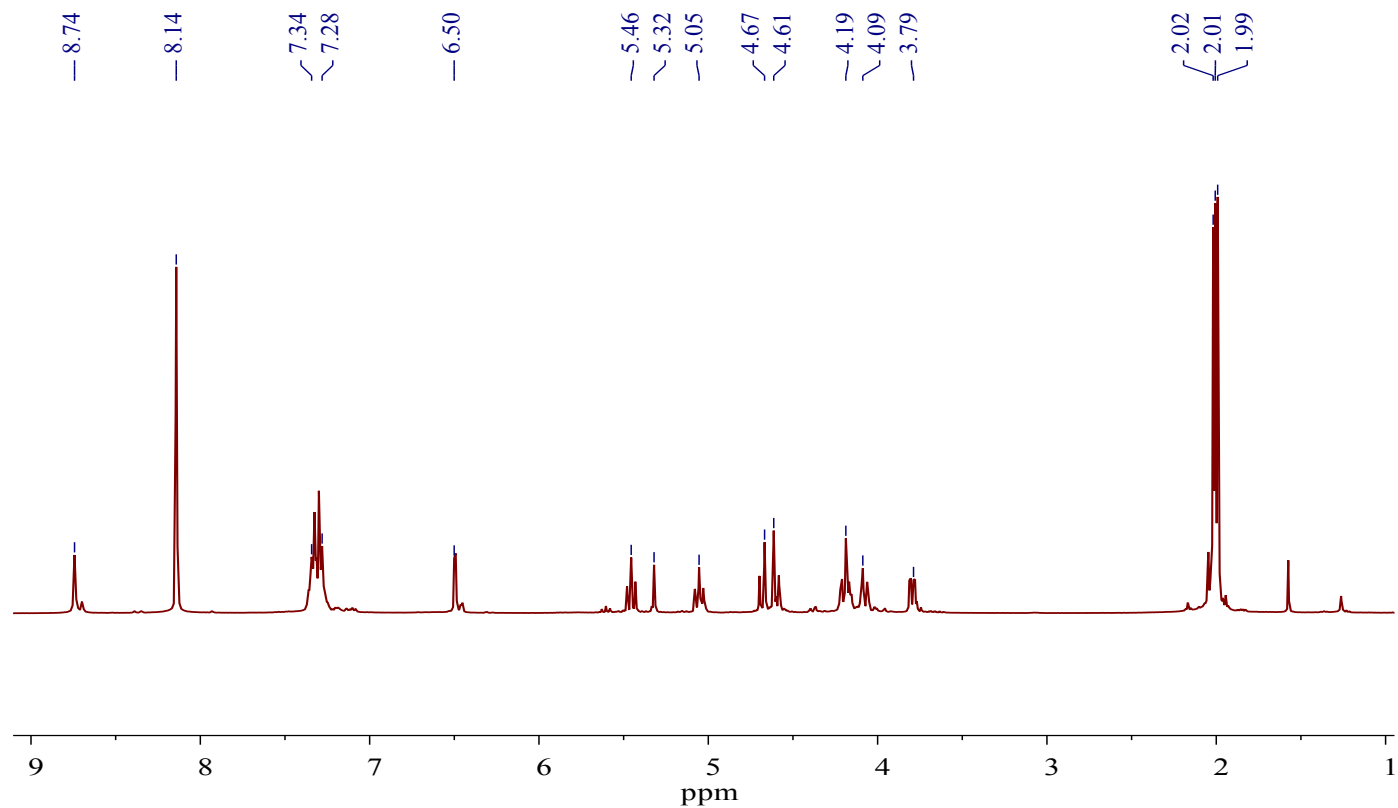

$^1\text{H}$  NMR (400 MHz,  $\text{CD}_2\text{Cl}_2$ )  $\delta$   $^1\text{H}$  NMR (500 MHz, Chloroform-*d*)  $\delta$  8.74 (s, 1 H, NH); 7.35-7.28 (m, 5H, Ar); 6.50 (d,  $J$  = 3.7 Hz, 1H, H-1); 5.45 (dd,  $J$  = 9.7, 10.0 Hz, 1H, H-3); 5.05 (dd,  $J$  = 9.7, 10.0 Hz, 1H, H-4); 4.68 (d,  $J$  = 12.1 Hz, 1H, Bn); 4.60 (d,  $J$  = 12.1 Hz, 1H, Bn); 4.22-4.15 (m, 2H, H-5, H-6a); 4.08 (bd,  $J$  = 10.4 Hz, 1H, H-6b); 3.80 (dd,  $J$  = 3.7, 9.7 Hz, 1H, H-2); 2.02 (s, 3H, Ac); 2.01 (s, 3 H, Ac); 1.99 (s, 3 H, Ac)



Figure S2.  $^{13}\text{C}$  DEPT135 spectrum of donor **1**

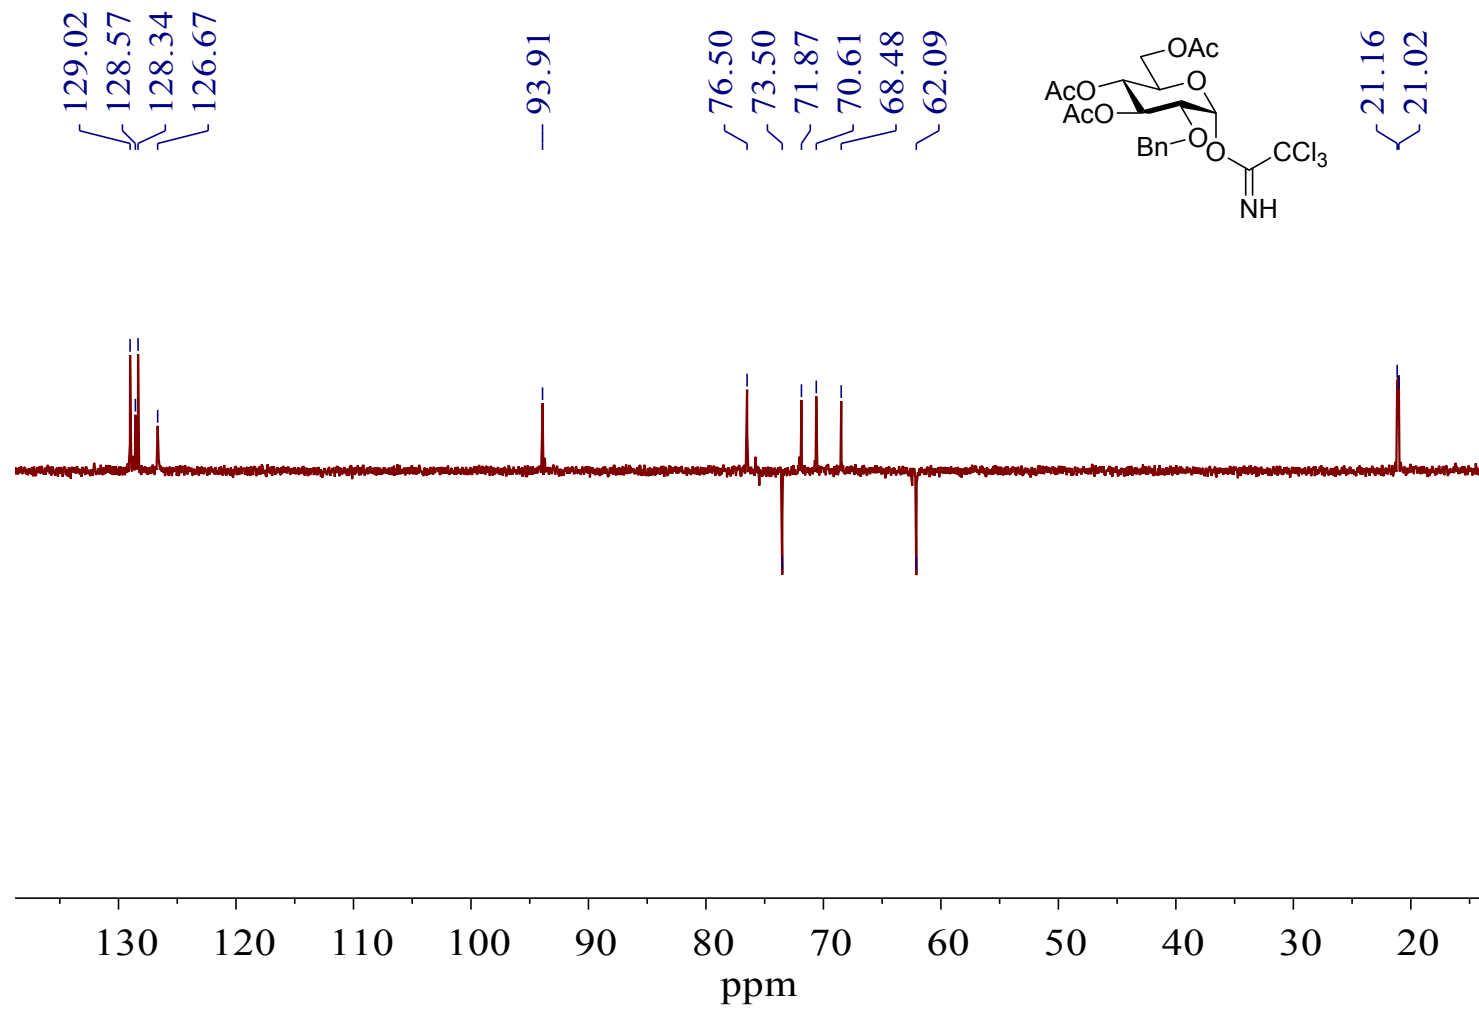

Figure S3. <sup>13</sup>C NMR spectrum of donor **1**

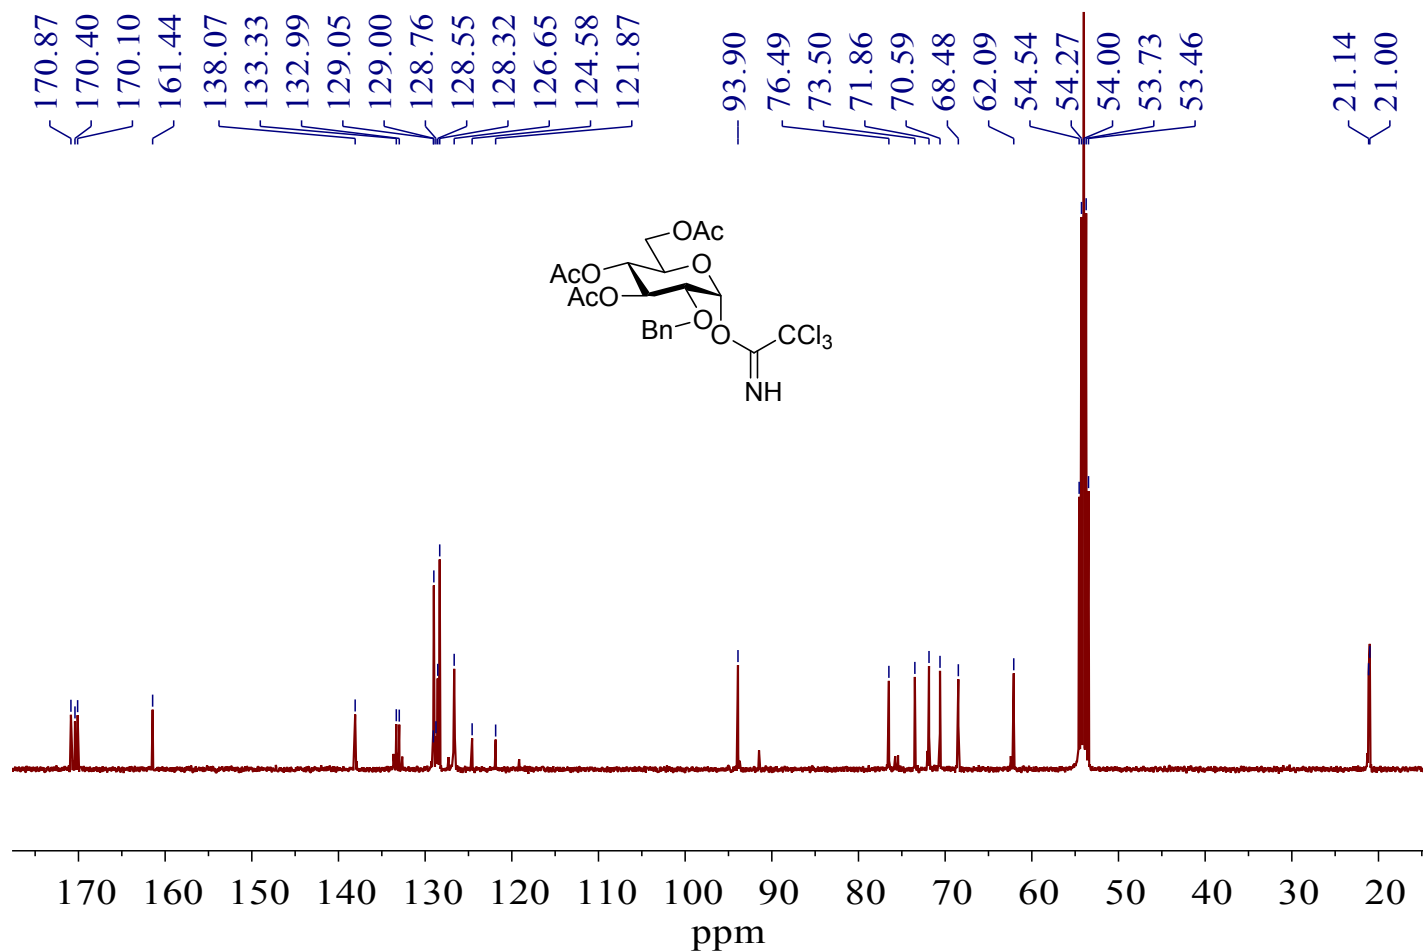

<sup>13</sup>C NMR (126 MHz, CD<sub>2</sub>Cl<sub>2</sub>) δ 170.9 (Ac), 170.4 (Ac), 170.1 (Ac), 161.4 (C=N), 129.0, 128.6, 128.3, 126.7 (6 C, Ar), 93.9 (C-1), 76.5 (C-2), 73.5 (Bn), 71.9 (C-3), 70.6 (C-5), 68.5 (C-4), 62.1 (C-6), 21.2 (Ac), 21.0 (2xAc).

Figure S4. COSY spectrum of donor 1

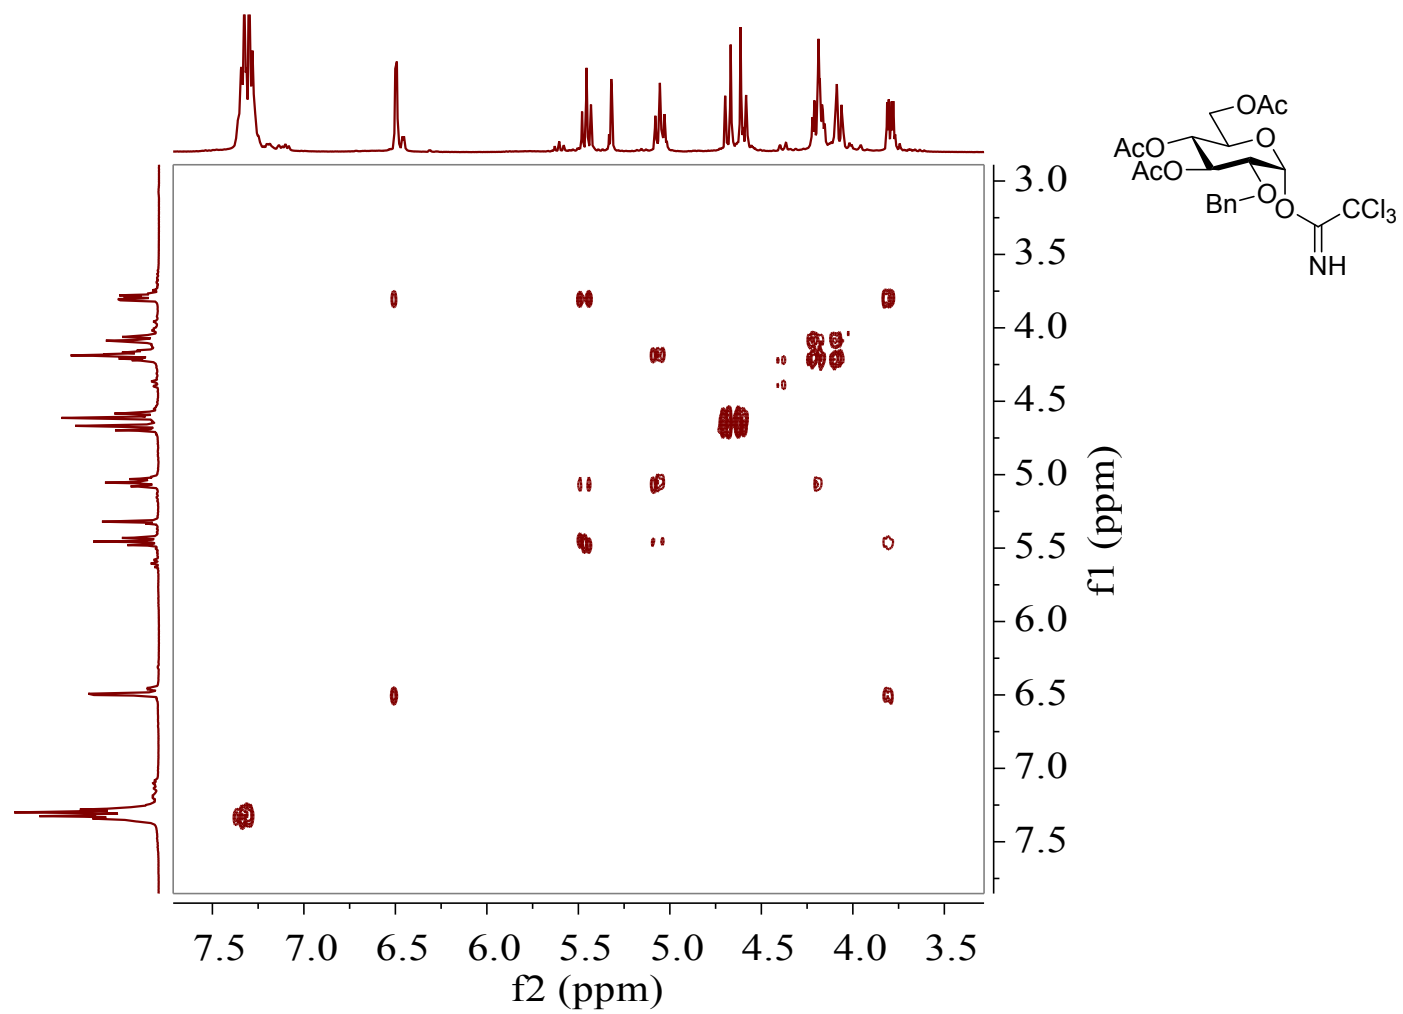

Figure S5. HSQC spectrum of donor 1

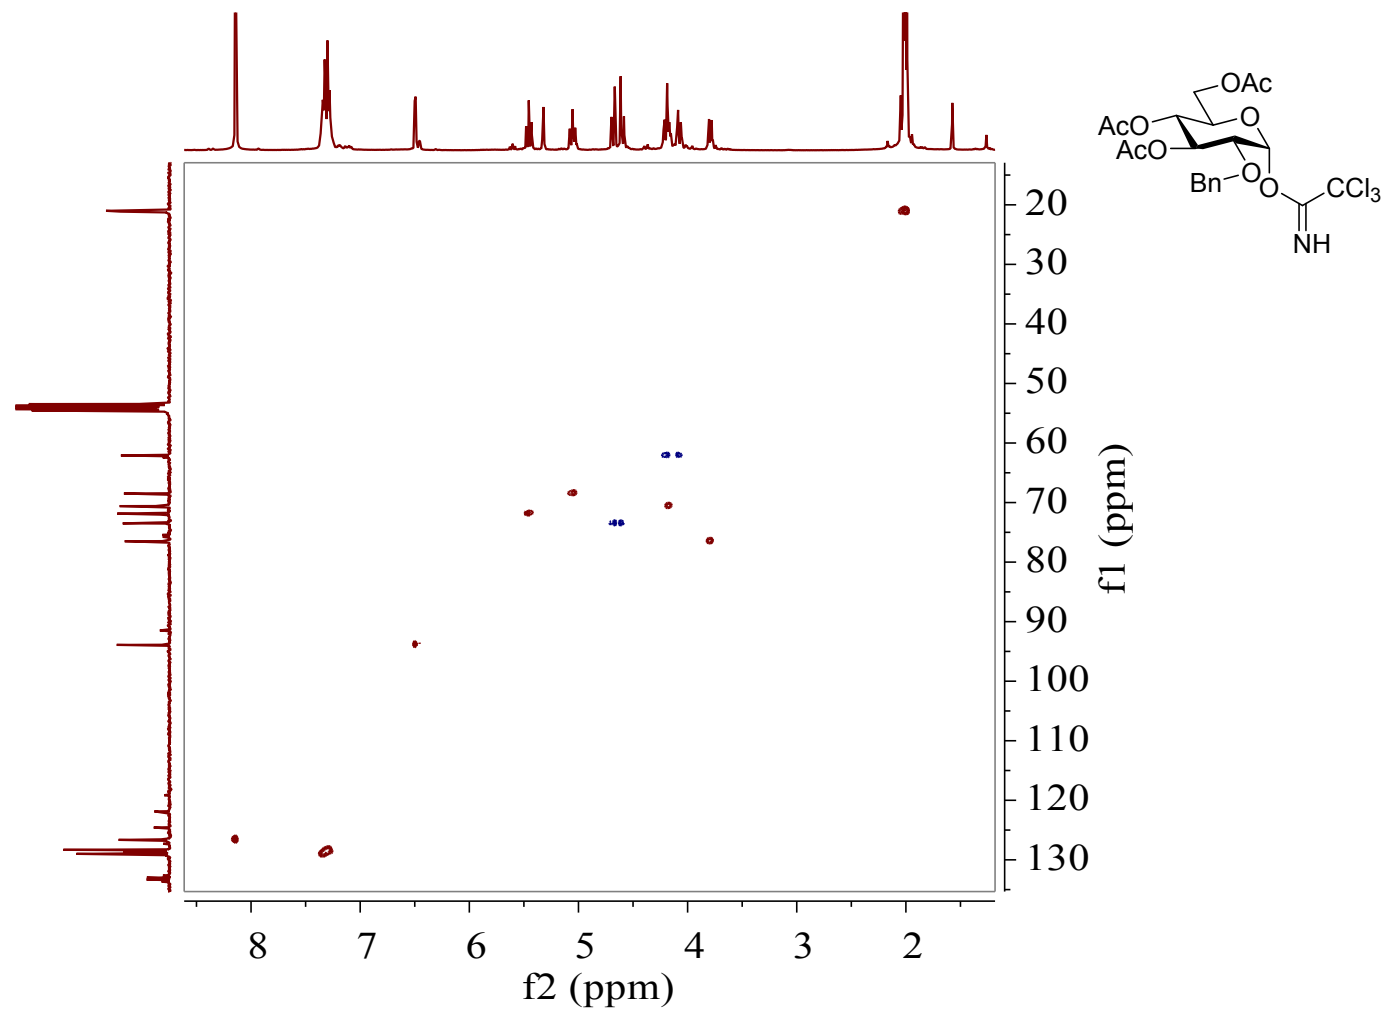

### S3. Decomposition studies of donor 1 with TMSOTf

Figure S6. <sup>1</sup>H NMR spectrum of glycosylation reactions catalyzed by TMSOTf at -55 °C

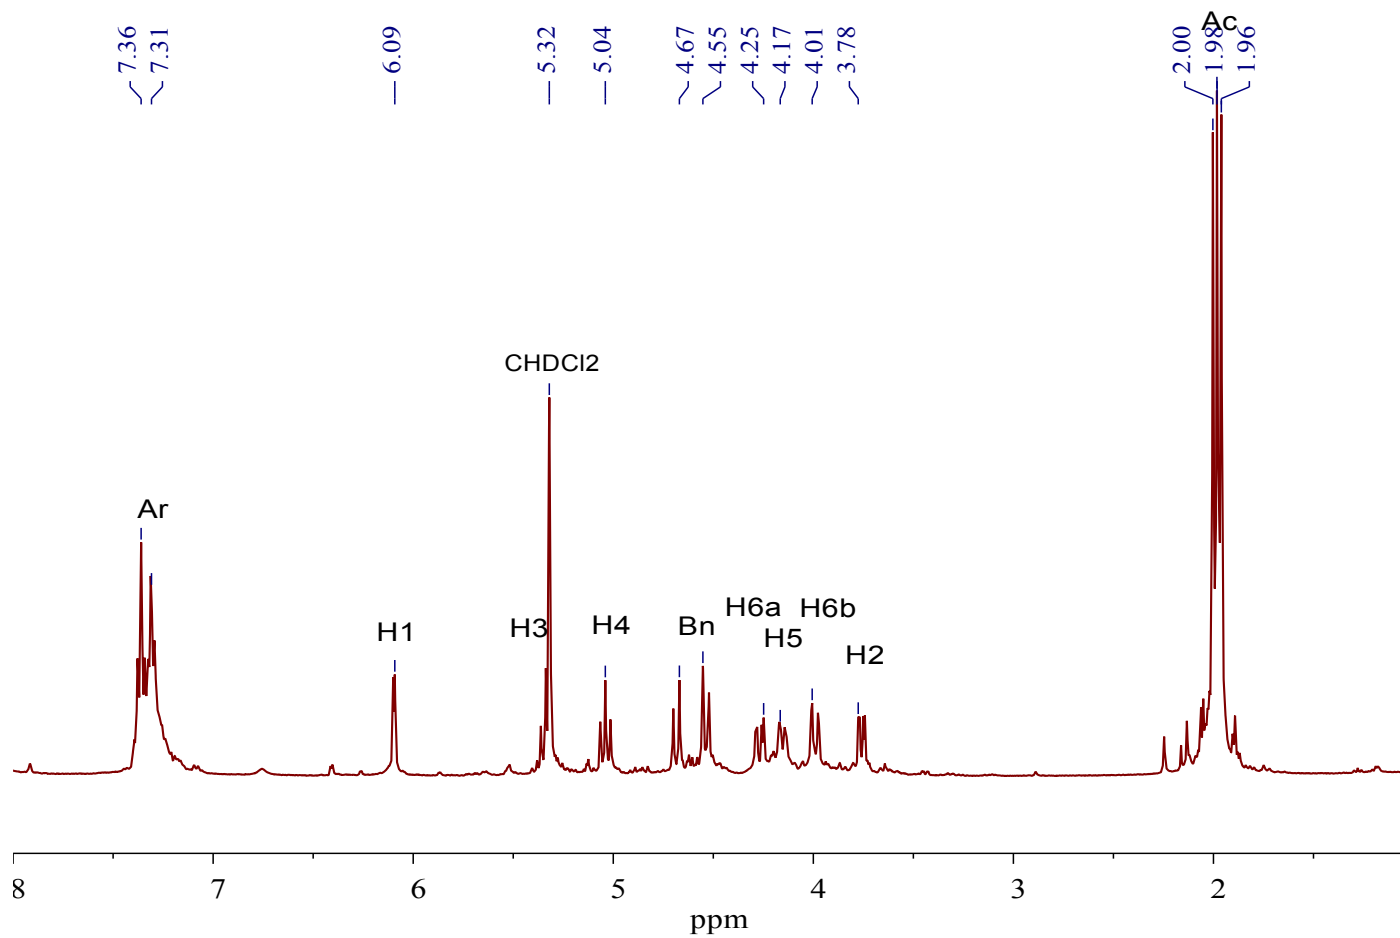

Figure S7. COSY spectrum of glycosylation reactions catalyzed by TMSOTf at -55 °C

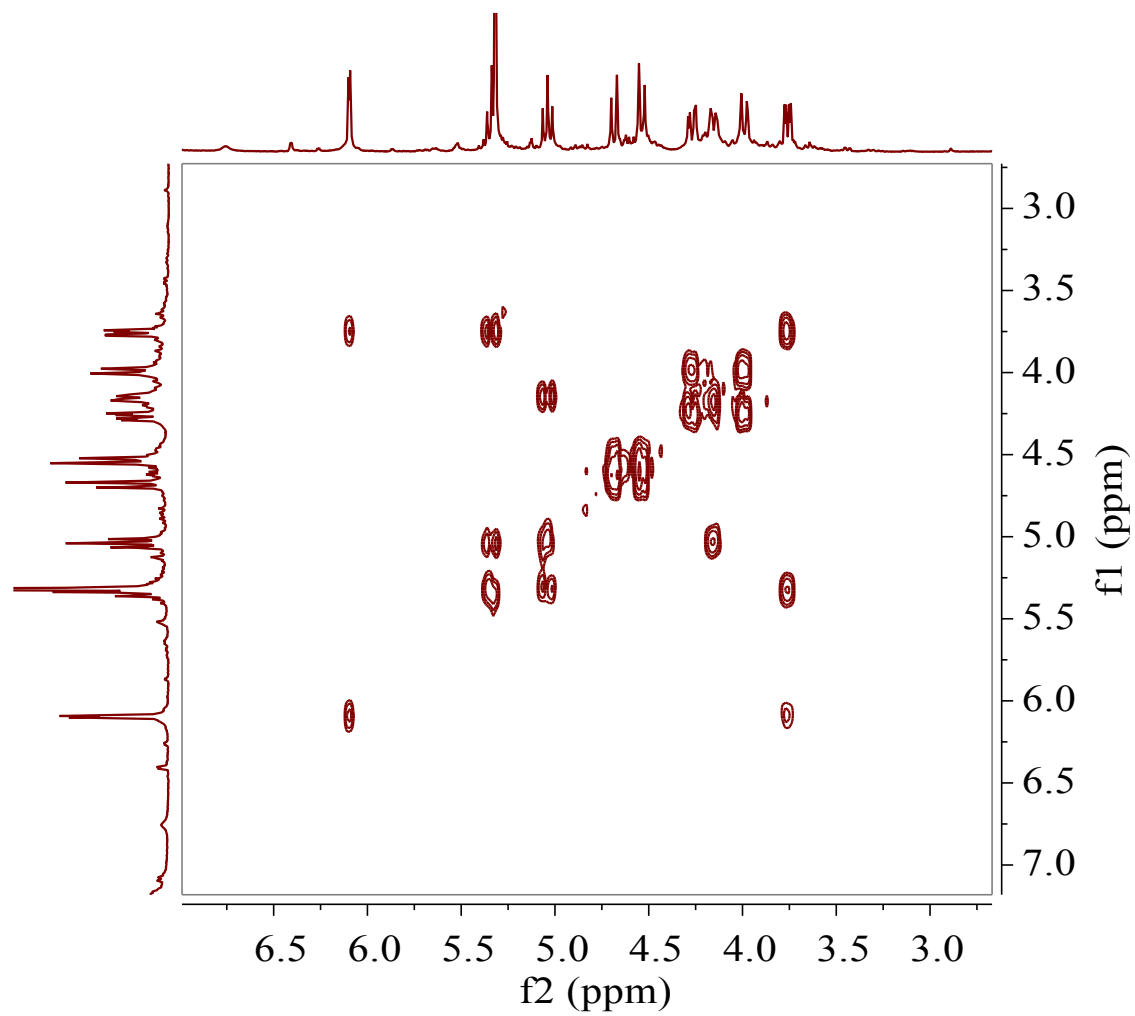

Figure S8.  $^{13}\text{C}$  DEPT135 spectrum of glycosylation reactions catalyzed by TMSOTf at  $-55\text{ }^\circ\text{C}$

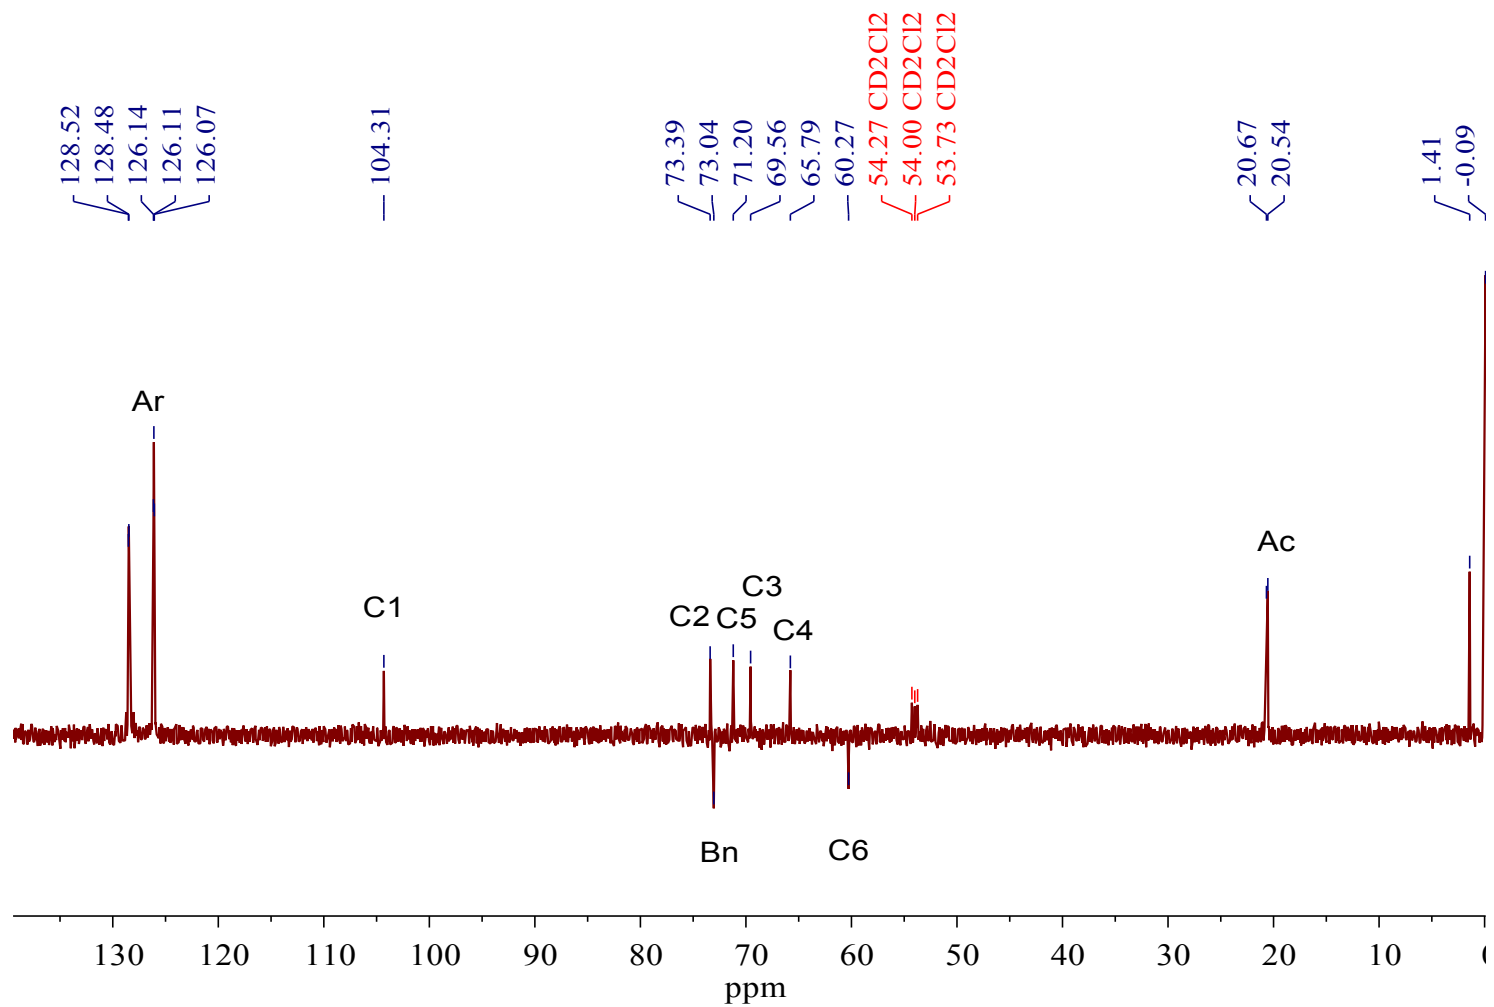

Figure S9. HSQC spectrum of glycosylation reactions catalyzed by TMSOTf at -55 °C

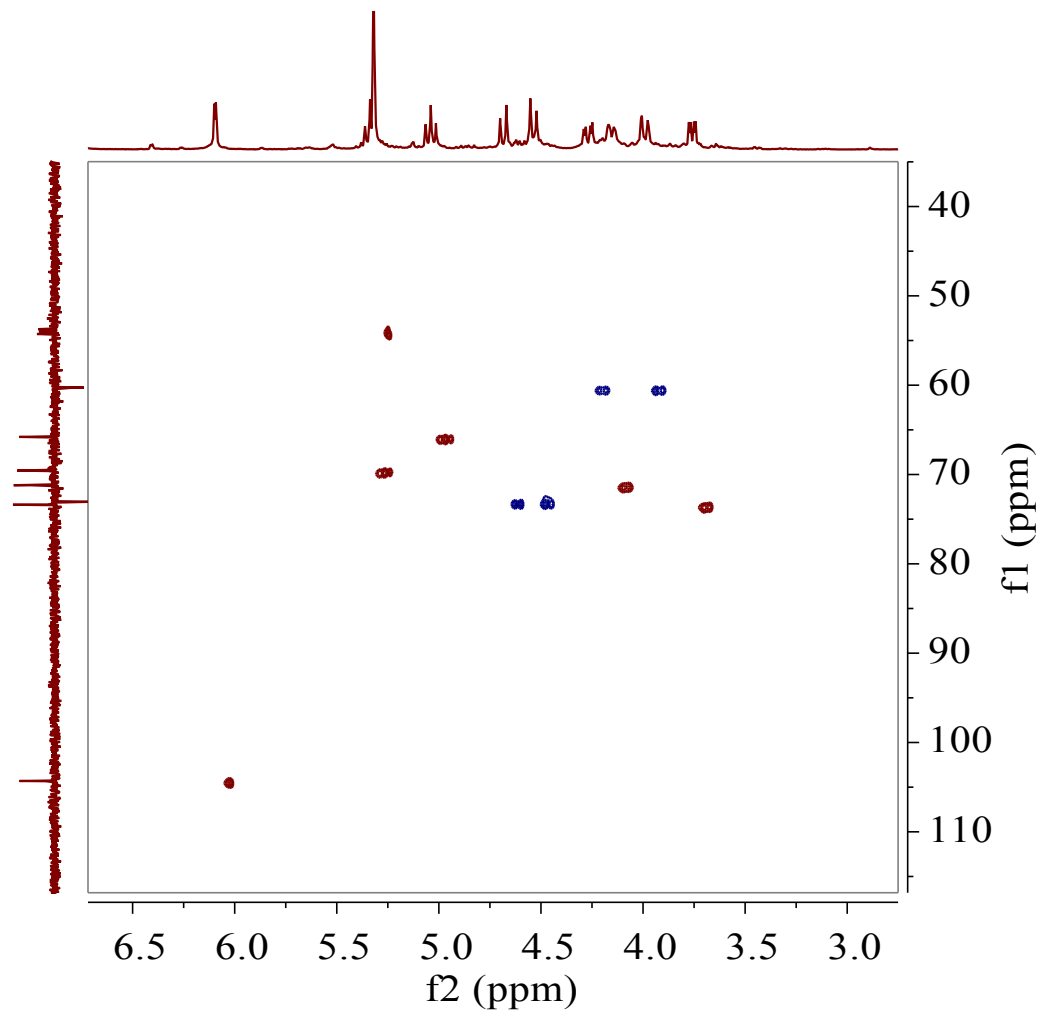



Figure S10.  $^{13}\text{C}$  NMR spectrum of glycosylation reactions catalyzed by TMSOTf at  $-55\text{ }^\circ\text{C}$

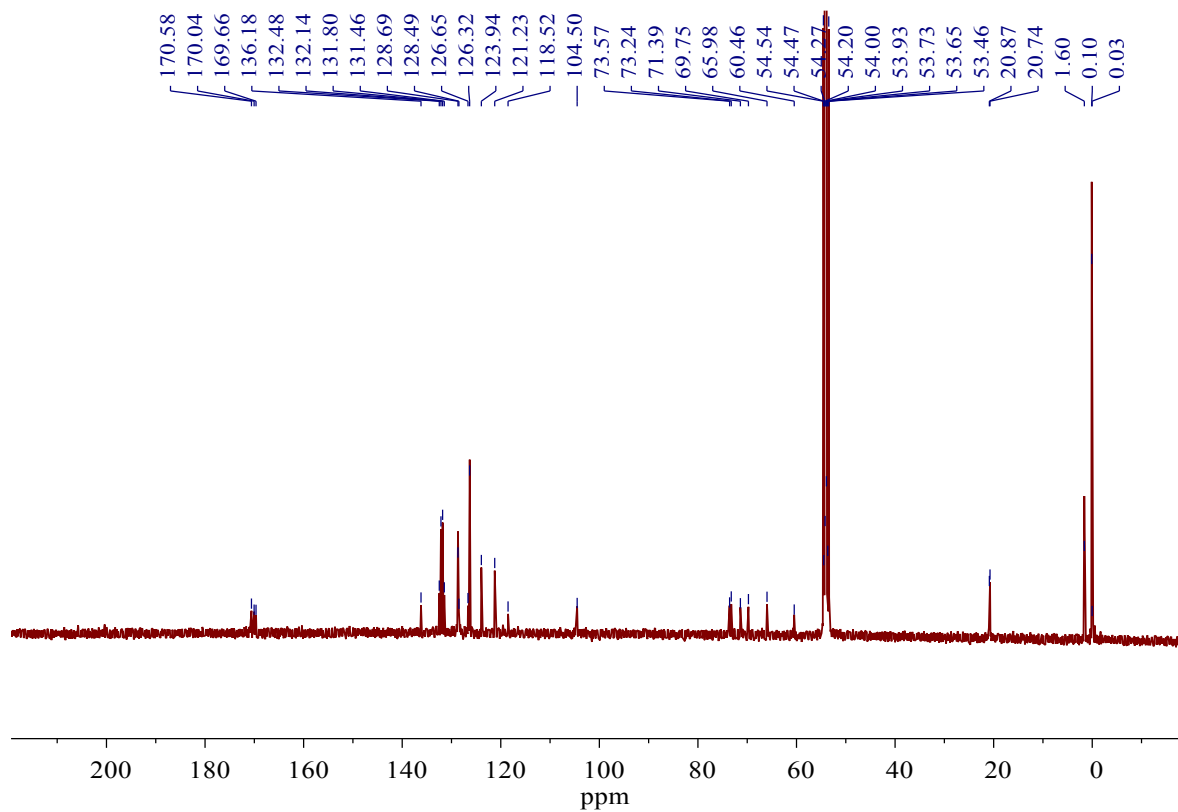

Figure S11.  $^1\text{H}$  DOSY and  $^{19}\text{F}$  DOSY spectra of glycosylation reactions catalyzed by TMSOTf at  $-55\text{ }^\circ\text{C}$

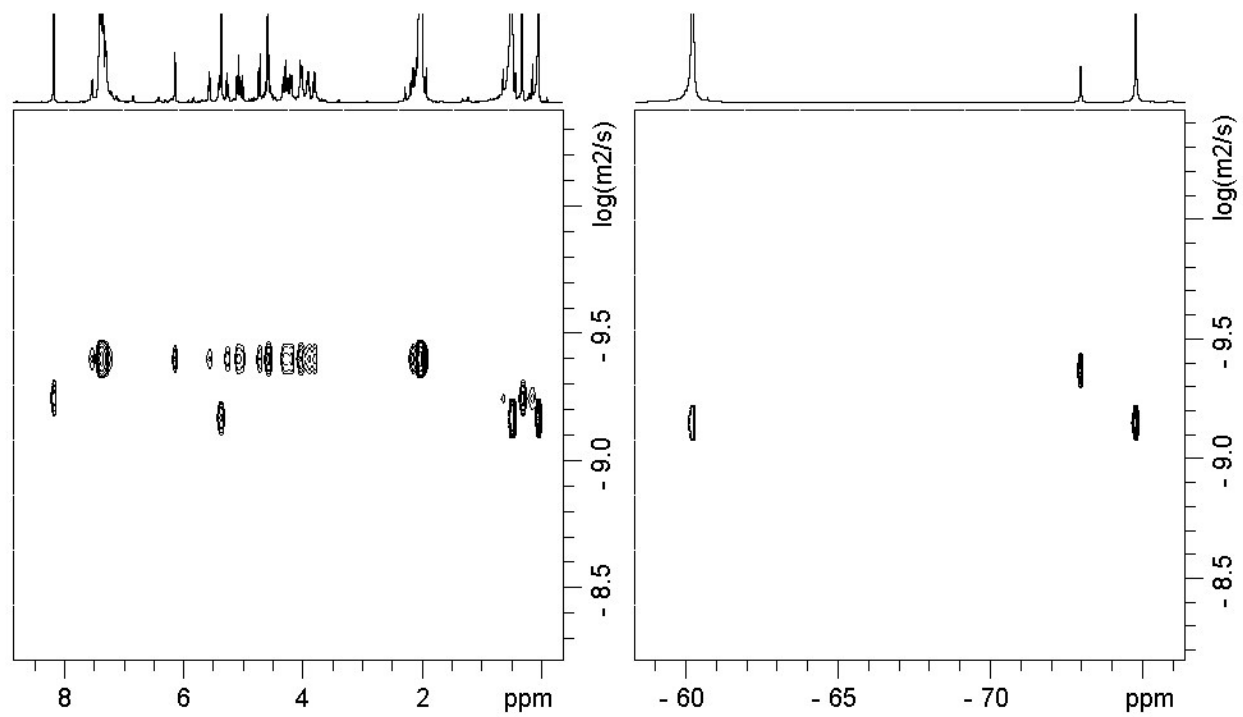

Figure S12.  $^1\text{H}$  NMR spectra of glycosylation reactions catalyzed by TMSOTf from  $-55\text{ }^\circ\text{C}$  to  $5\text{ }^\circ\text{C}$

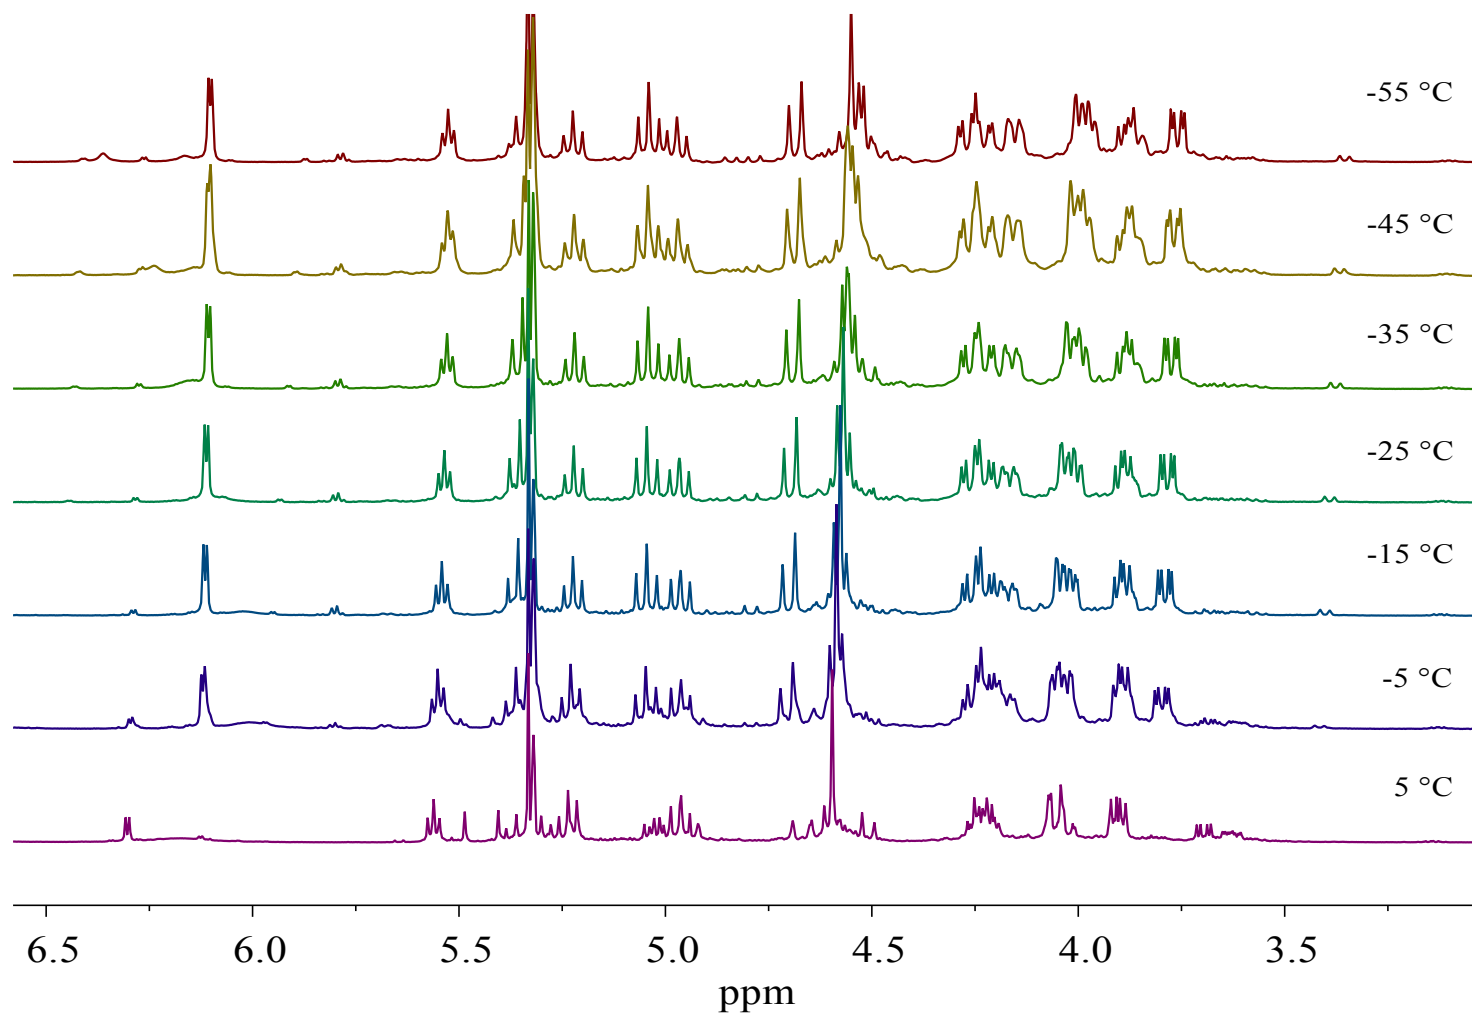

#### S4. Decomposition studies of donor with $\text{BF}_3 \cdot \text{OEt}_2$

Figure S13.  $^1\text{H}$  NMR spectrum of glycosylation reactions catalyzed by  $\text{BF}_3 \cdot \text{OEt}_2$  at  $-55\text{ }^\circ\text{C}$

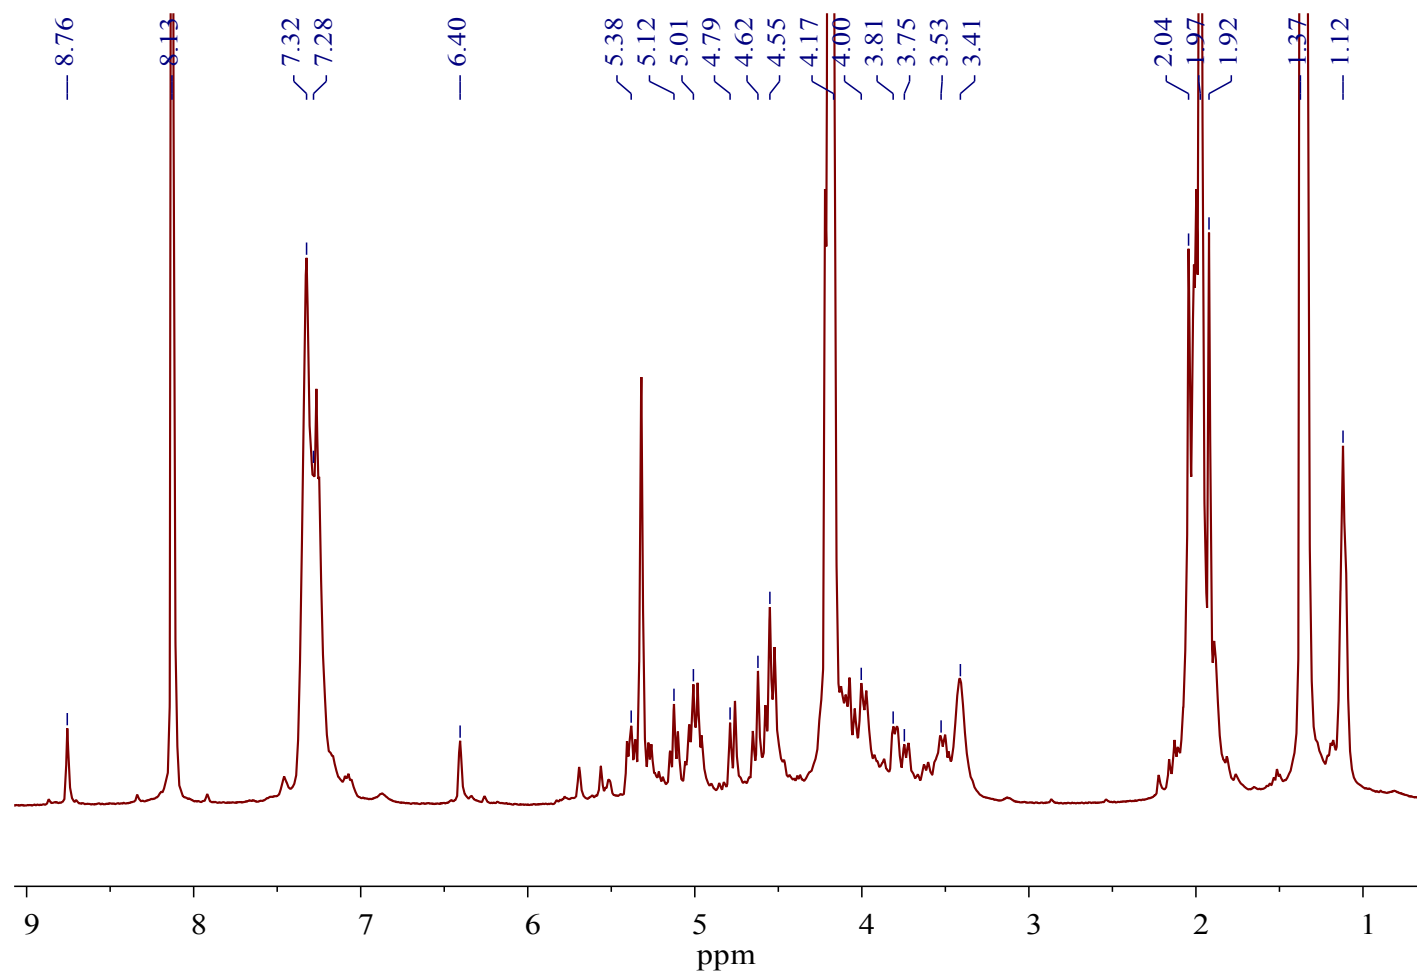

Figure S14.  $^{19}\text{F}$  NMR spectrum of glycosylation reactions catalyzed by  $\text{BF}_3 \cdot \text{OEt}_2$  at  $-55\text{ }^\circ\text{C}$

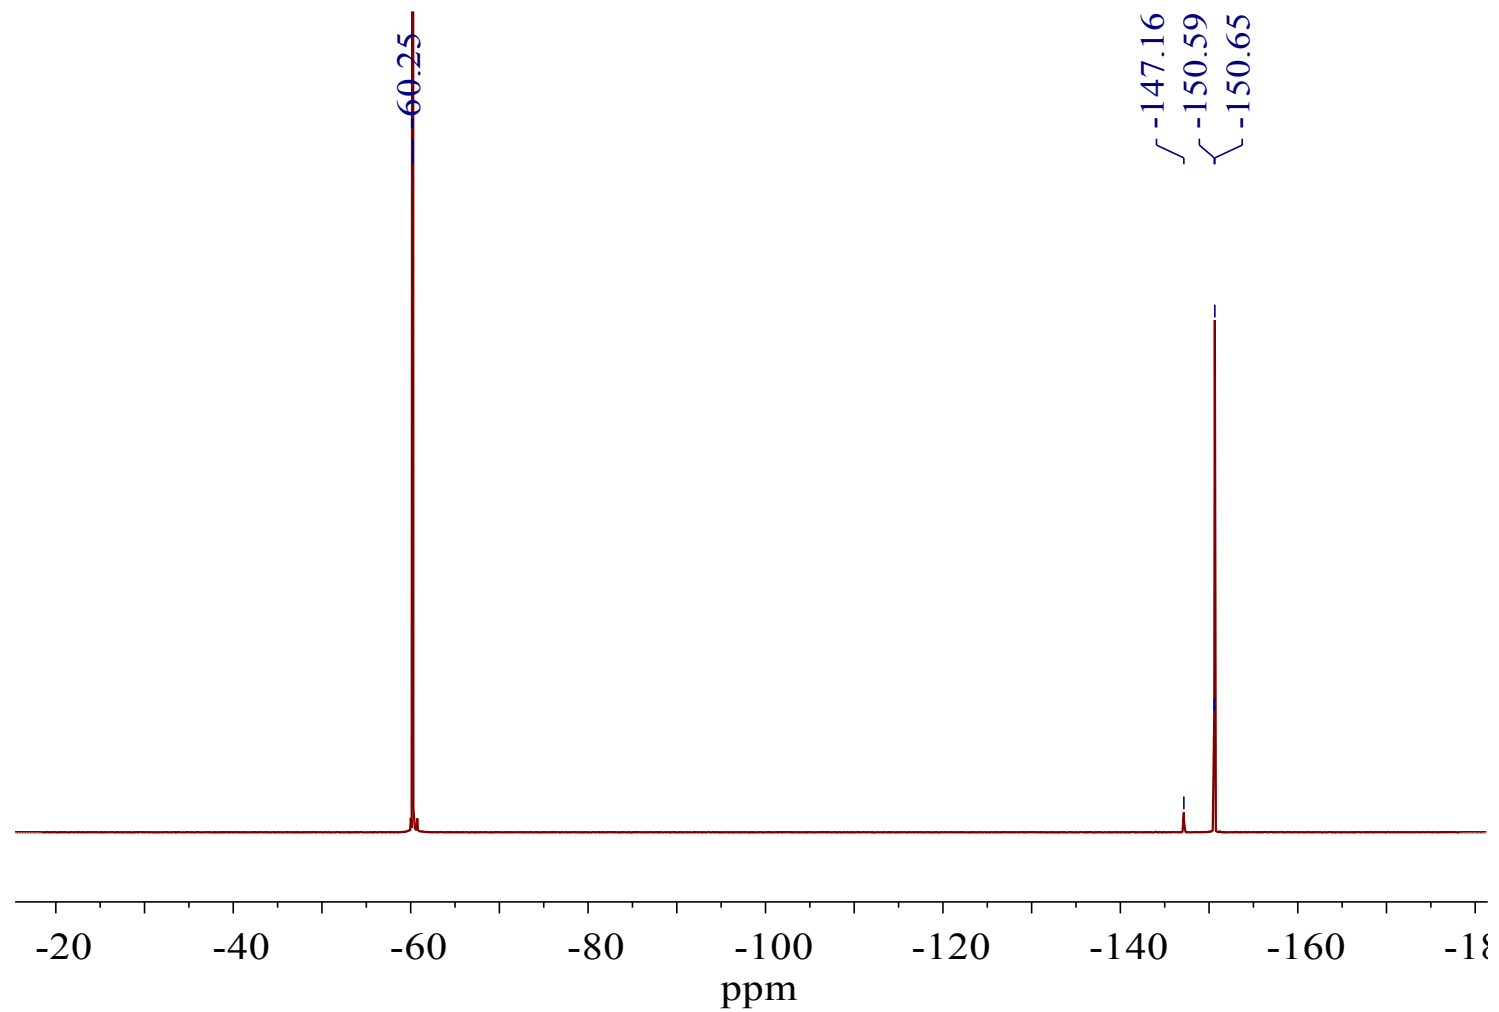

Figure S15. HSQC spectrum of glycosylation reactions catalyzed by  $\text{BF}_3 \cdot \text{OEt}_2$  at  $-55^\circ\text{C}$

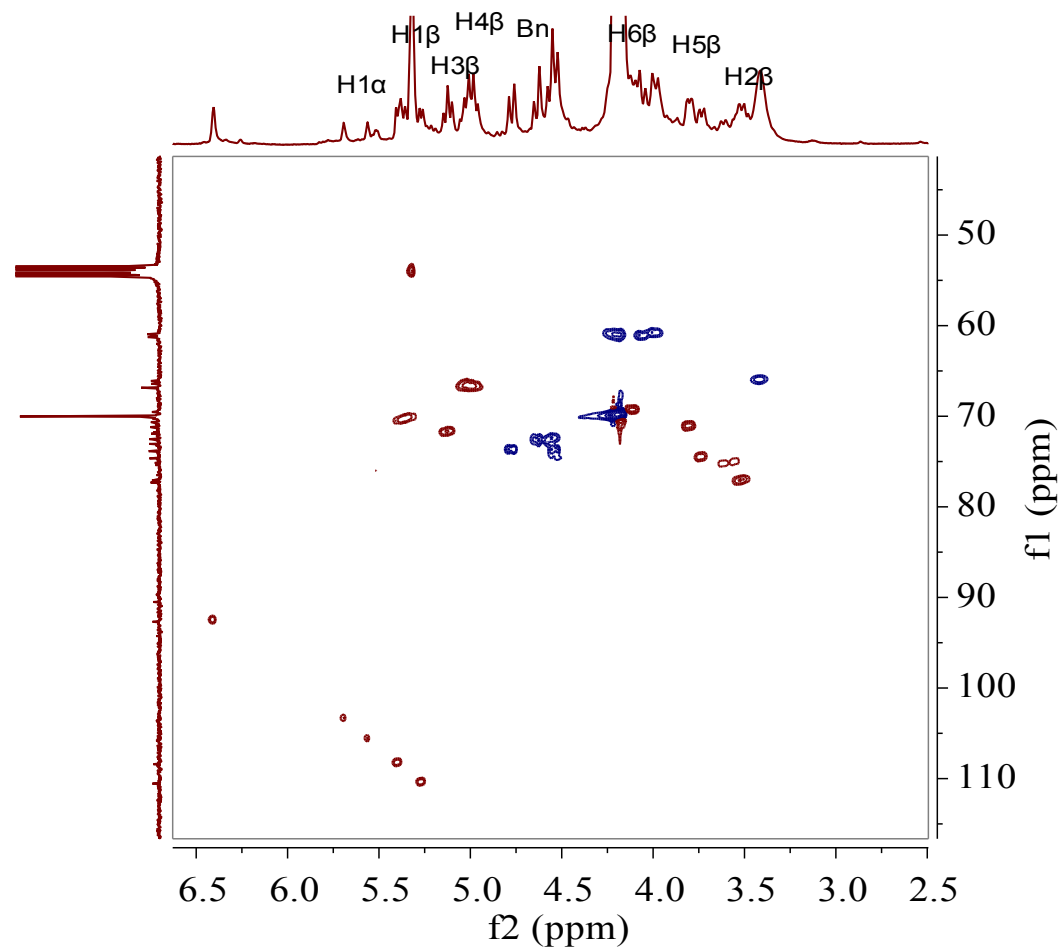

Figure S16.  $^{13}\text{C}$  NMR spectrum of glycosylation reactions catalyzed by  $\text{BF}_3 \cdot \text{OEt}_2$  at  $-55^\circ\text{C}$

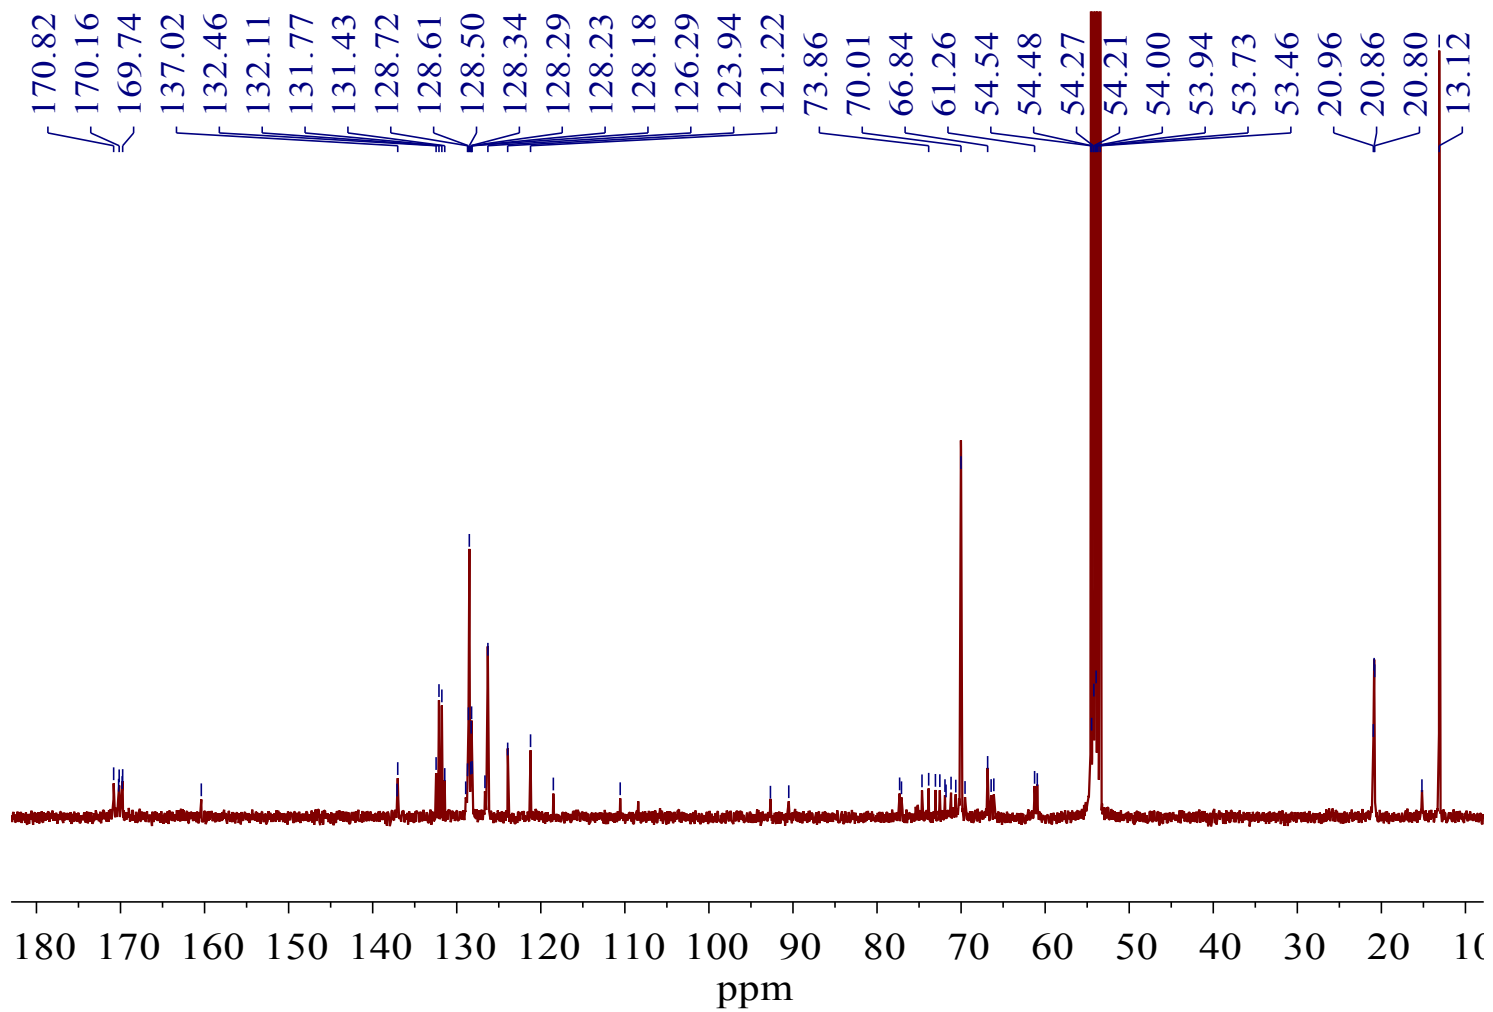

Figure S17.  $^{11}\text{B}$  NMR spectrum of glycosylation reactions catalyzed by  $\text{BF}_3\cdot\text{OEt}_2$  at  $-55\text{ }^\circ\text{C}$ . Using the chemical shift of the  $\text{BF}_3\cdot\text{OEt}_2$  as a reference (0 ppm). The peak at  $-1.21\text{ ppm}$  is characteristic for a B-O or B-N complex.

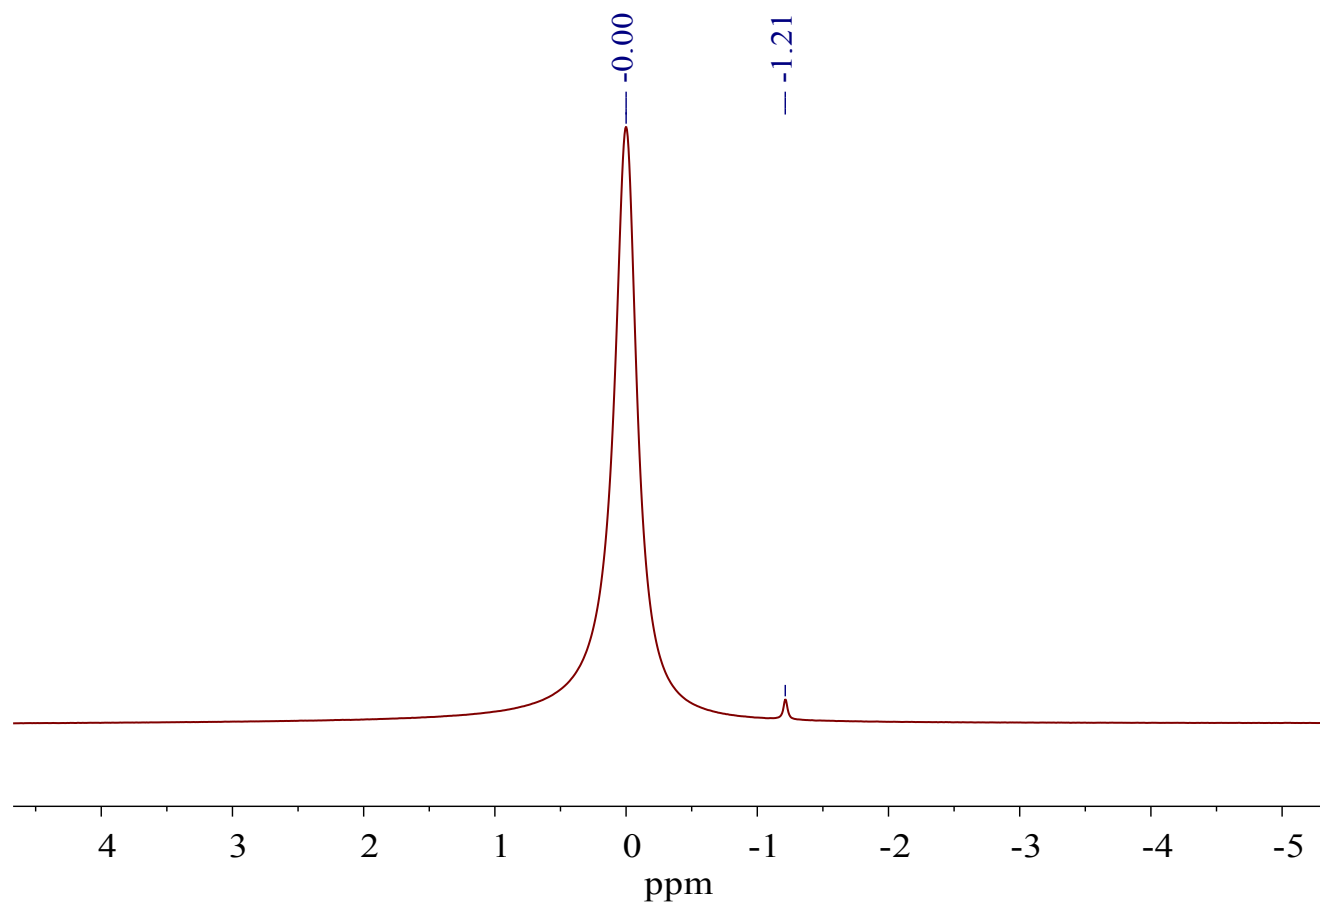



Figure S18.  $^1\text{H}$  DOSY and  $^{19}\text{F}$  DOSY spectra of glycosylation reactions catalyzed by  $\text{BF}_3 \cdot \text{OEt}_2$  at  $-55^\circ\text{C}$

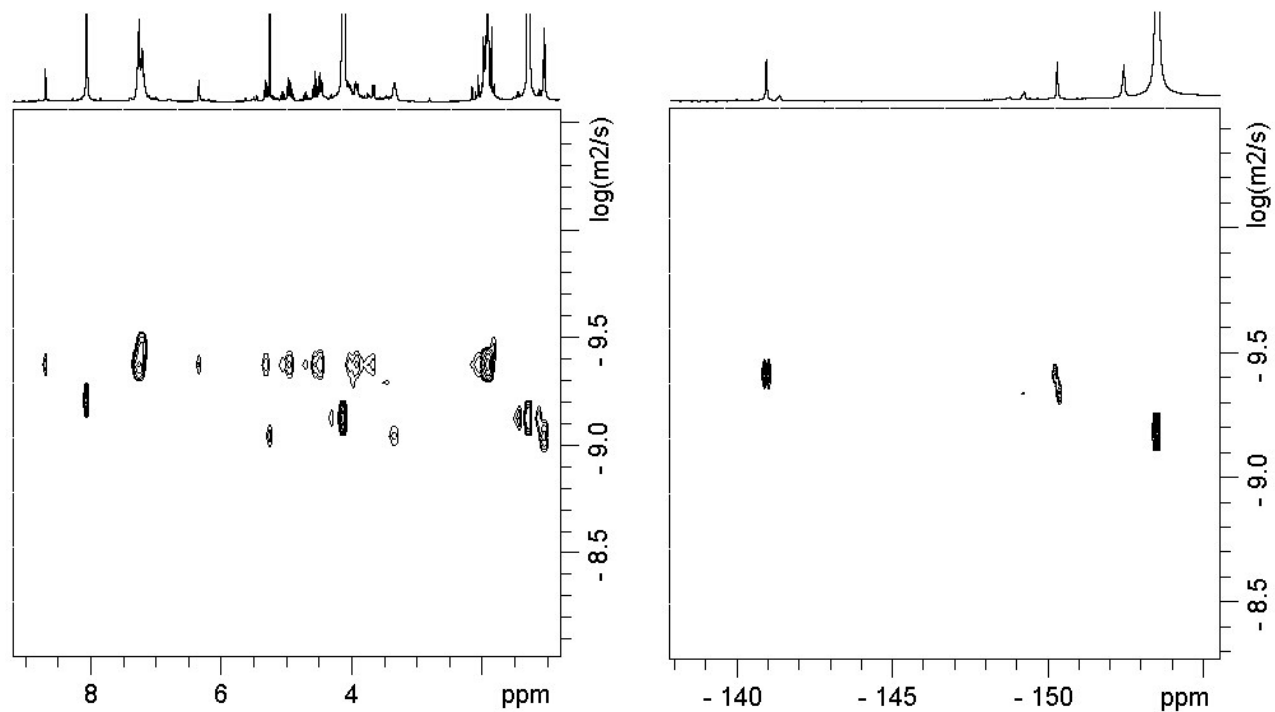

Figure S19.  $^1\text{H}$  NMR spectra of glycosylation reactions catalyzed by  $\text{BF}_3 \cdot \text{OEt}_2$  from  $-55\text{ }^\circ\text{C}$  to  $-15\text{ }^\circ\text{C}$

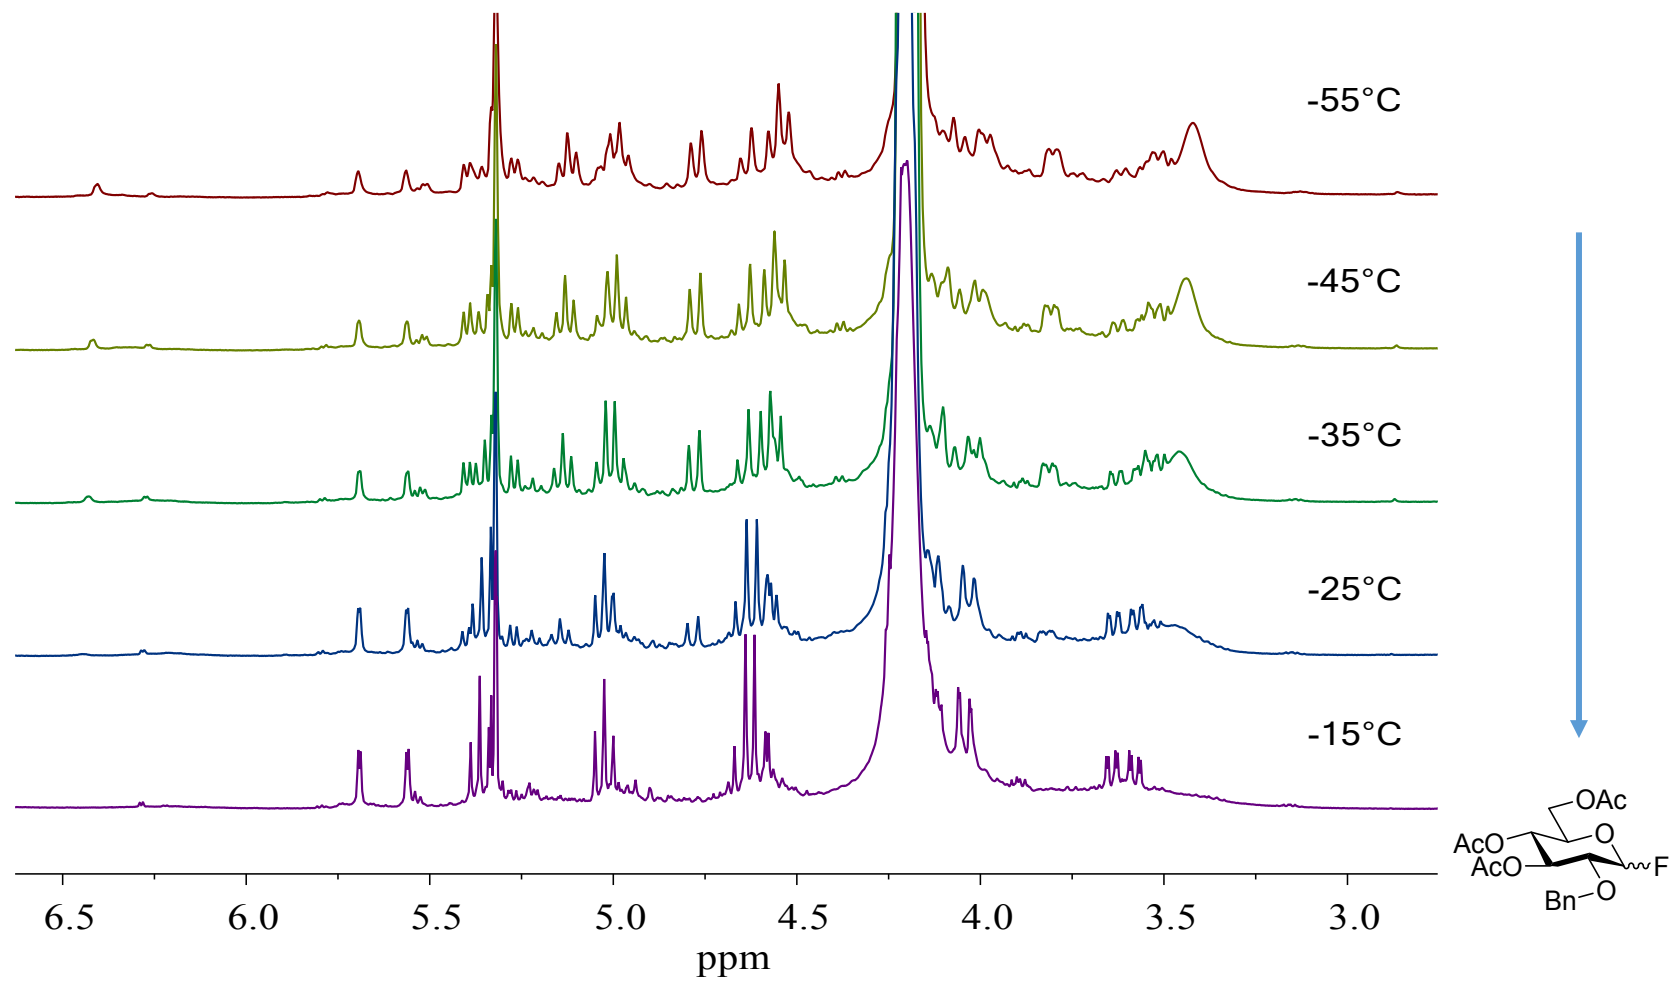

Figure S20. COSY spectrum of glycosylation reactions catalyzed by  $\text{BF}_3 \cdot \text{OEt}_2$  at  $-15^\circ\text{C}$

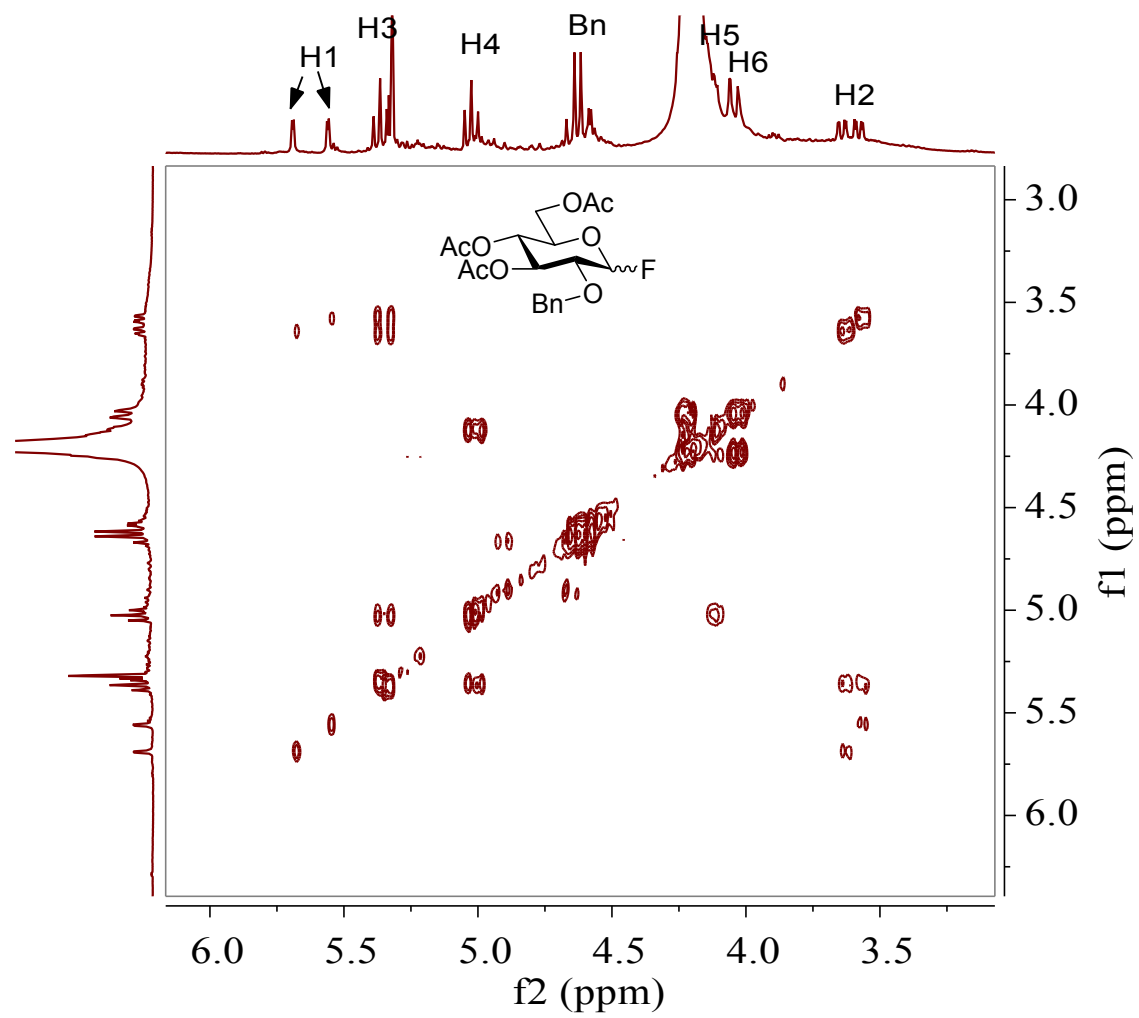

Figure S21.  $^{13}\text{C}$  DEPT135 spectrum of glycosylation reactions catalyzed by  $\text{BF}_3 \cdot \text{OEt}_2$  at  $-15\text{ }^\circ\text{C}$

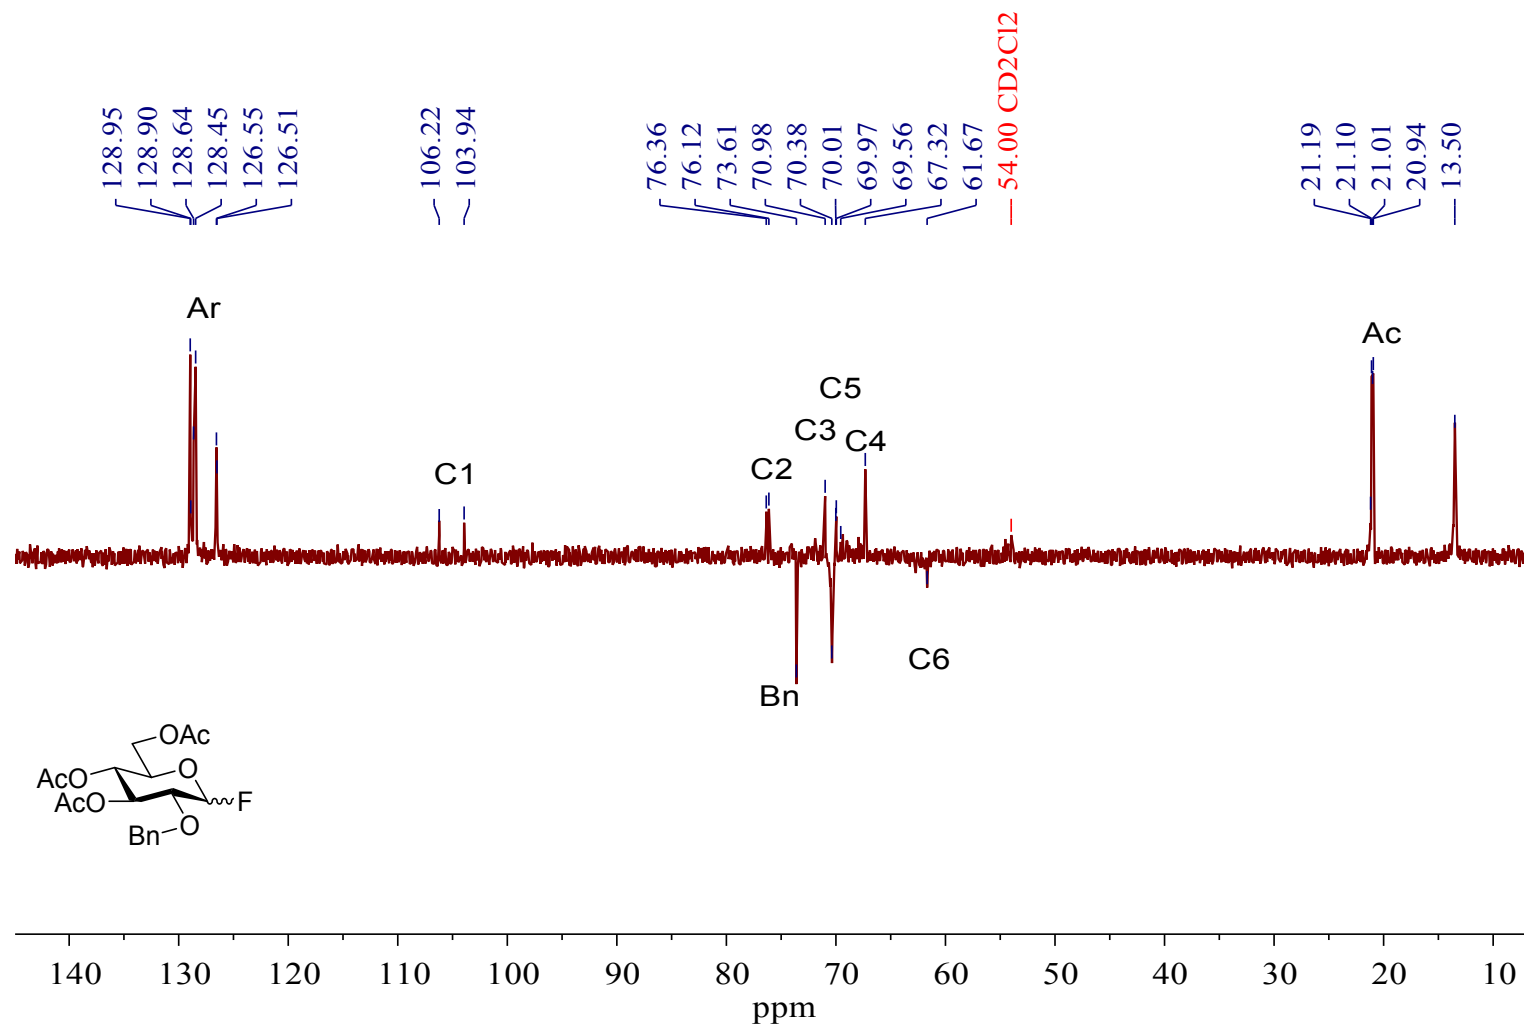

Figure S22. HSQC spectrum of glycosylation reactions catalyzed by  $\text{BF}_3 \cdot \text{OEt}_2$  at  $-15^\circ\text{C}$

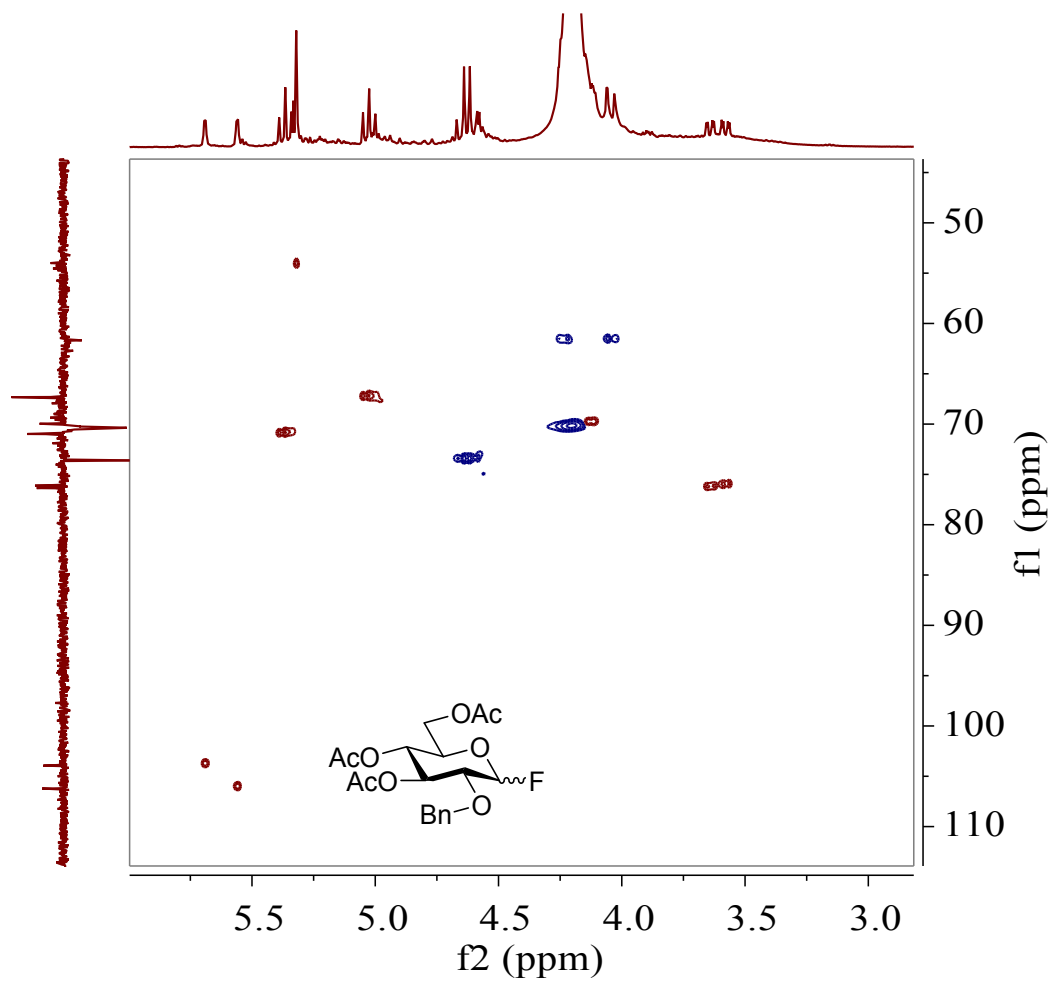

Figure S23.  $^{19}\text{F}$  NMR spectrum of glycosylation reactions catalyzed by  $\text{BF}_3 \cdot \text{OEt}_2$  at  $-15^\circ\text{C}$

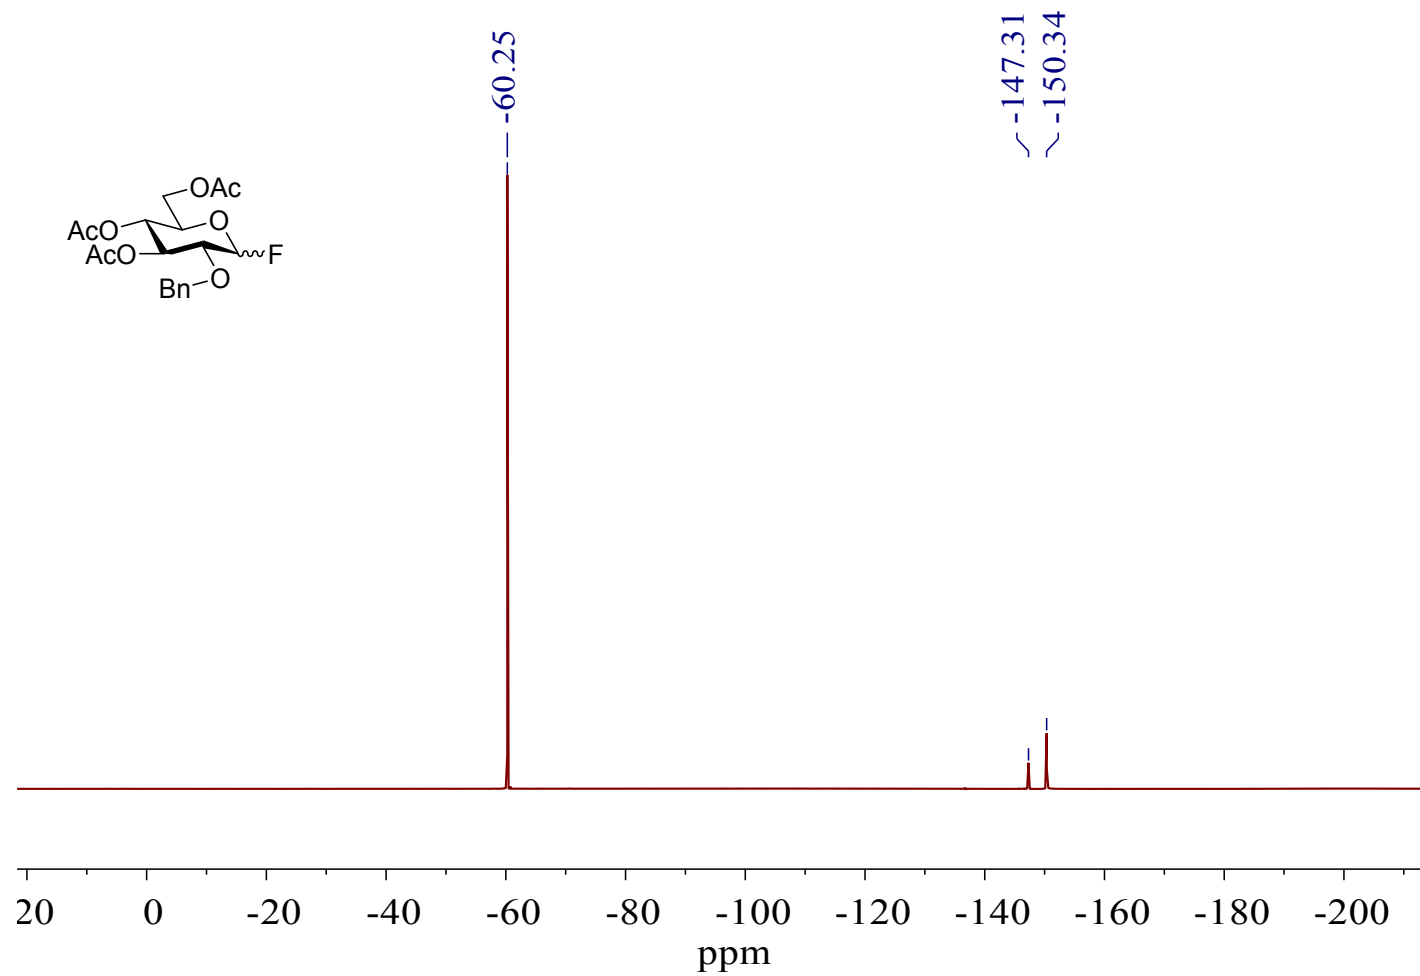

Figure S24.  $^1\text{H}$  NMR spectra of glycosylation reactions catalyzed by  $\text{BF}_3 \cdot \text{OEt}_2$  at  $-15^\circ\text{C}$  and recooling to  $-55^\circ\text{C}$

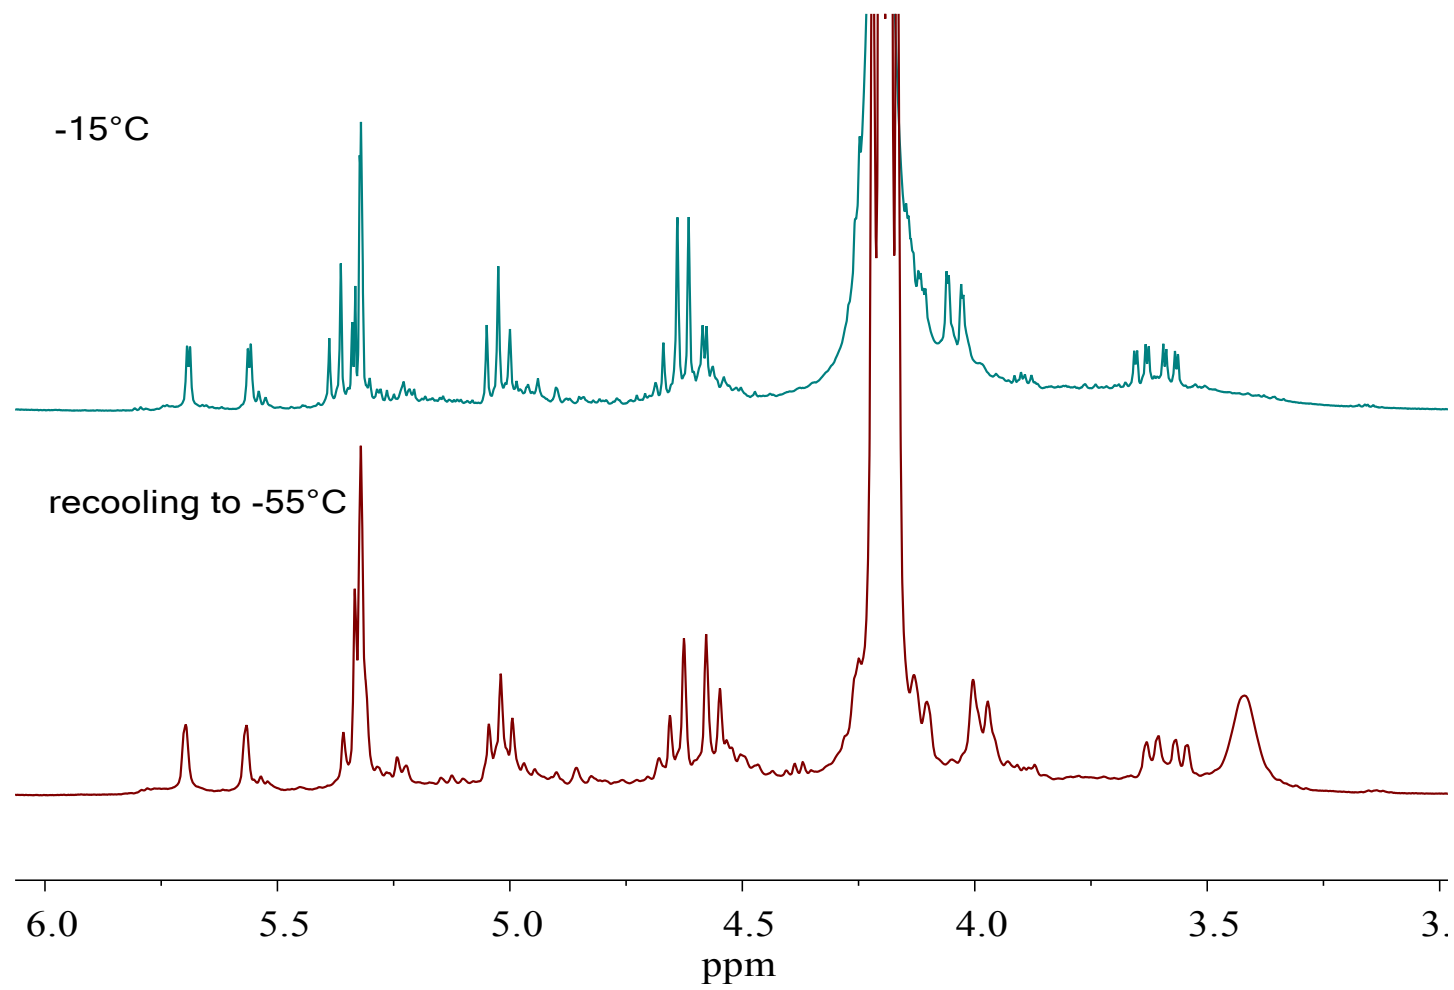

### S5. Decomposition studies of donor with TMSNTf<sub>2</sub>

Figure S25. <sup>1</sup>H NMR spectra of TMSNTf<sub>2</sub> in CD<sub>2</sub>Cl<sub>2</sub> at -55 °C

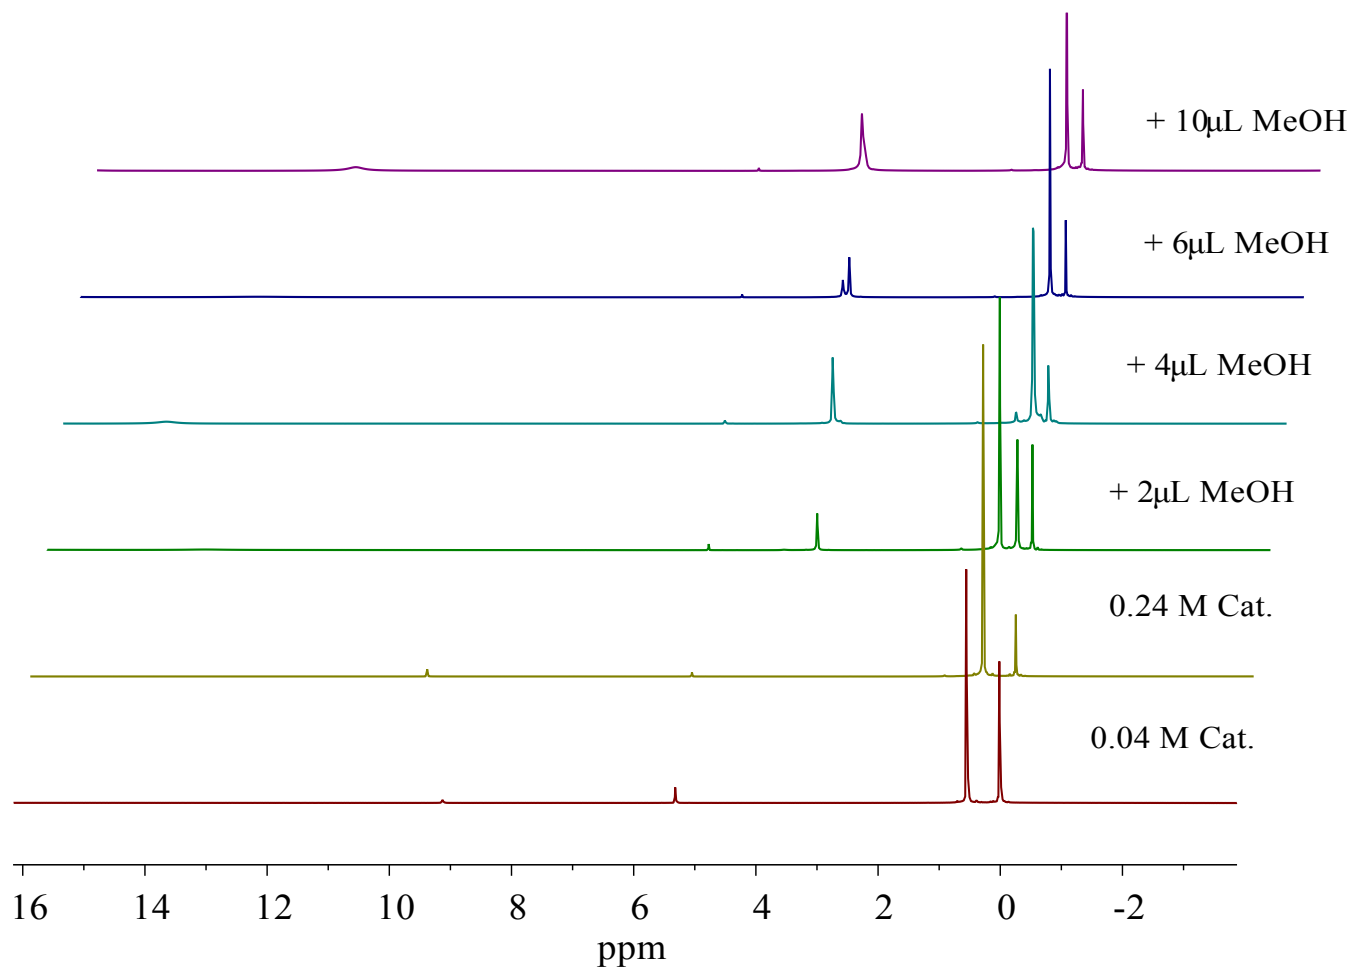



Figure S26.  $^{19}\text{F}$  NMR spectra of  $\text{TMSNTf}_2$  in  $\text{CD}_2\text{Cl}_2$  at  $-55\text{ }^\circ\text{C}$

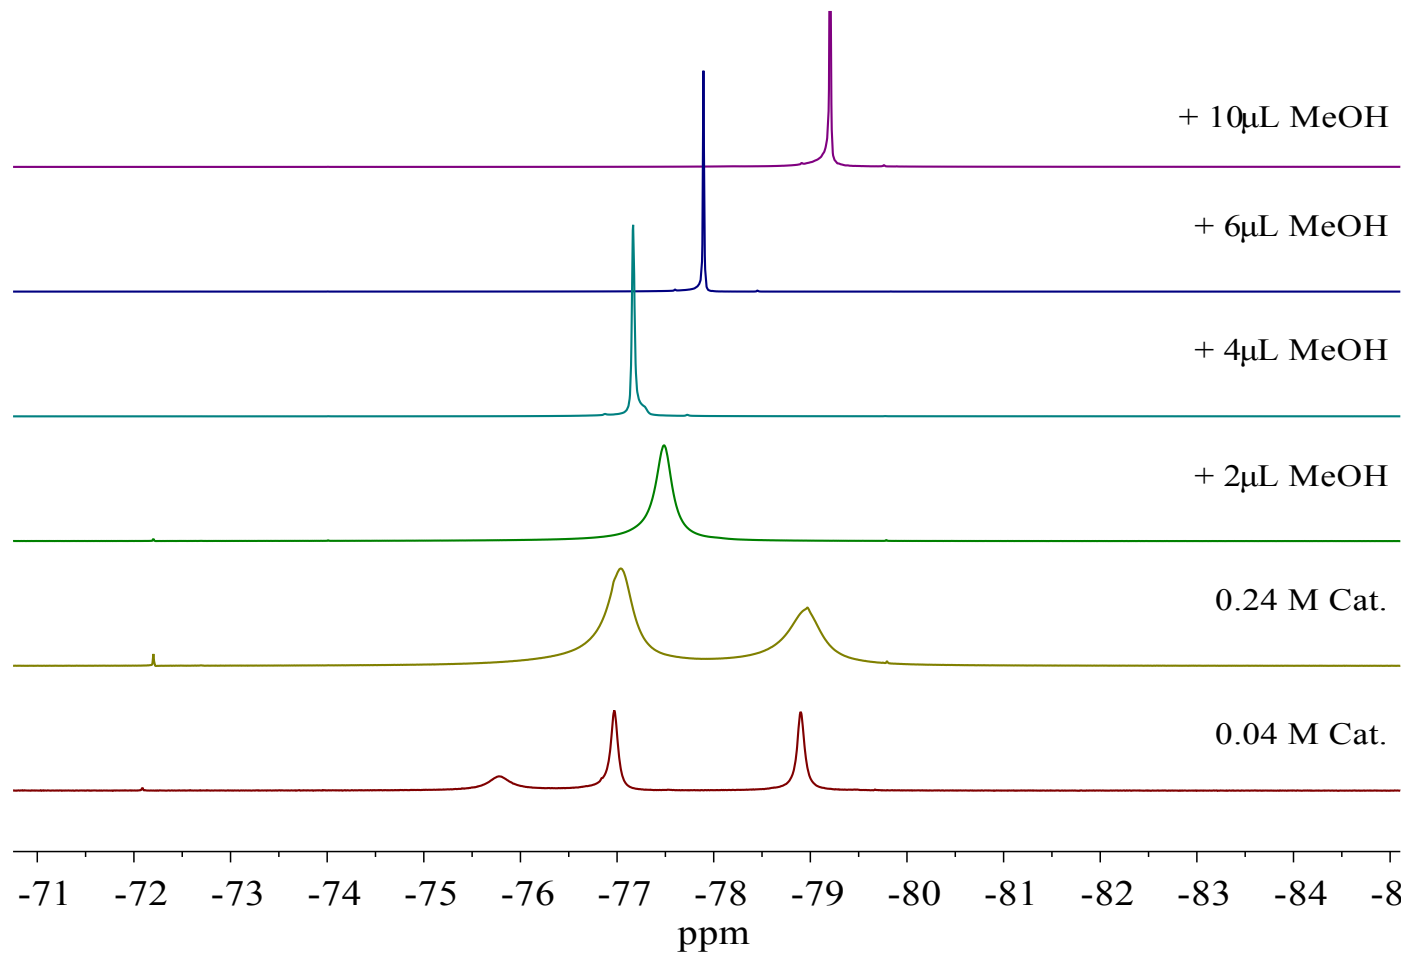

Figure S27.  $^1\text{H}$  NMR spectra of glycosylation reactions catalyzed by  $\text{TMSNTf}_2$  from 0 min to 30 min at  $-55\text{ }^\circ\text{C}$

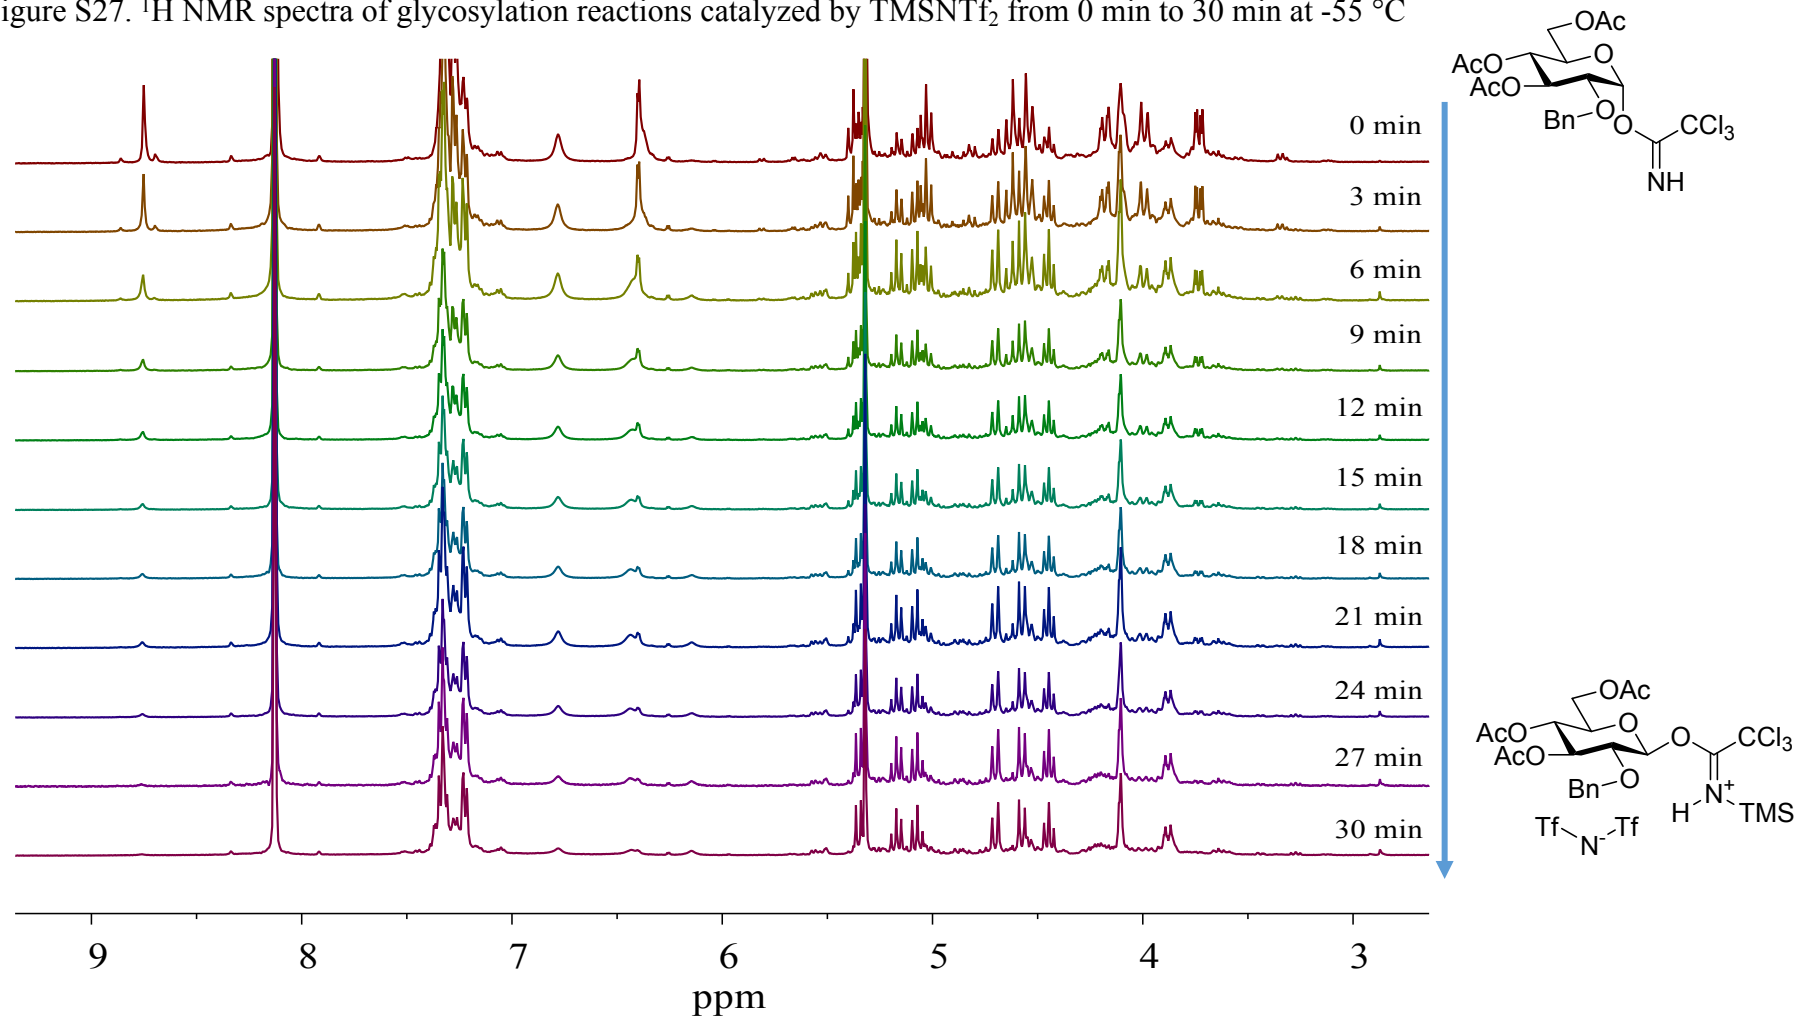

Figure S28. <sup>1</sup>H NMR spectrum of glycosylation reactions catalyzed by TMSNTf<sub>2</sub> at -55 °C

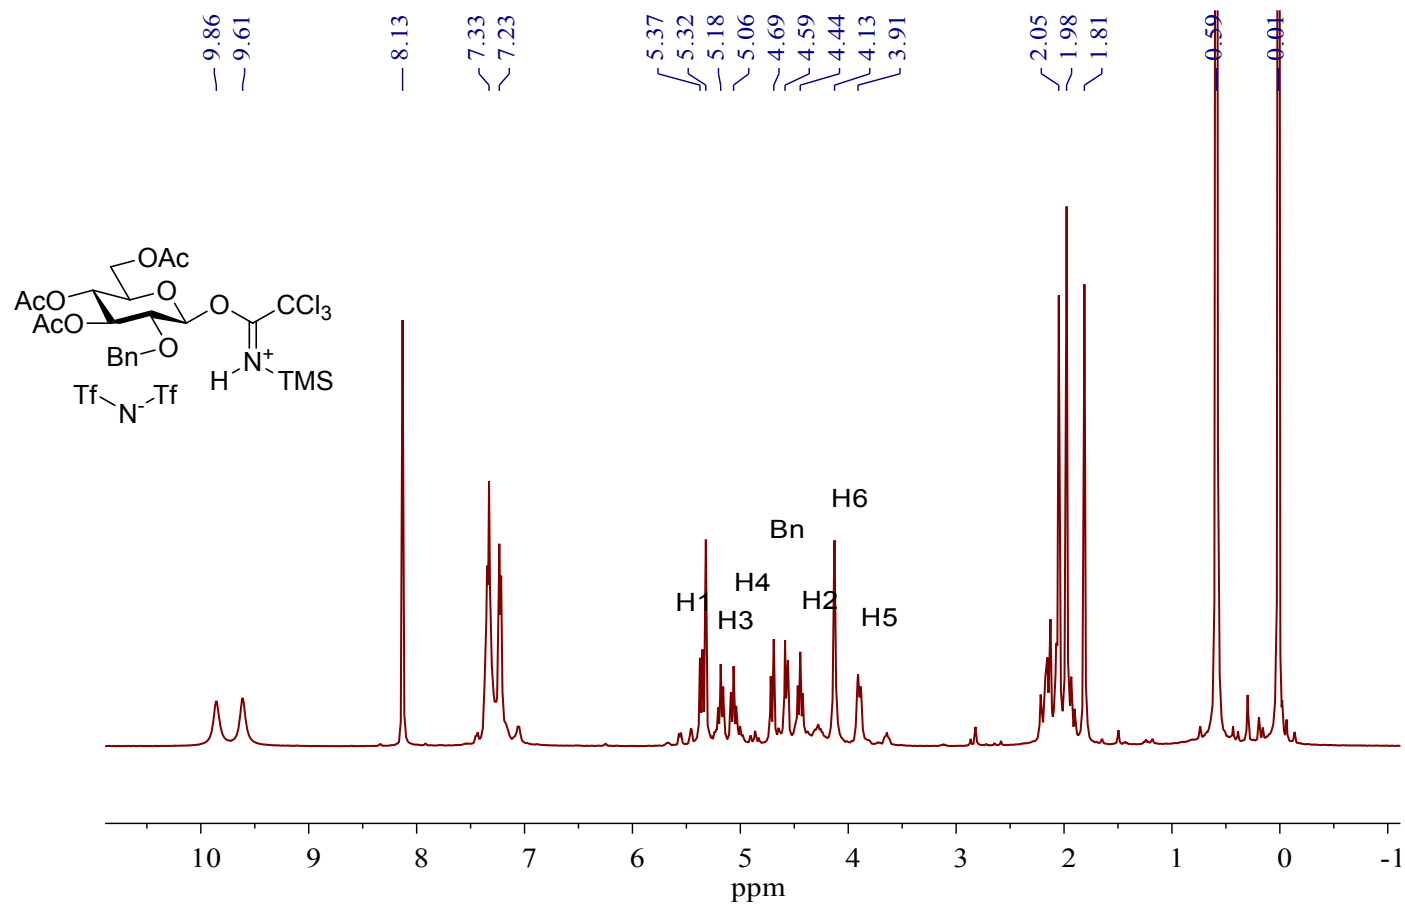

<sup>1</sup>H NMR (400 MHz, Methylene Chloride-*d*<sub>2</sub>) δ 7.36-7.19 (m, 5 H, Ph), 5.35 (d, *J* = 9.4 Hz, 1H, H-1), 5.17 (t, *J* = 9.4 Hz, 1H, H-3), 5.06 (t, *J* = 9.9 Hz, 1H, H-4), 4.69 (d, *J* = 11.2 Hz, 1H, Bn), 4.56 (d, *J* = 11.1 Hz, 1H, Bn), 4.43 (t, *J* ~ 9.4 Hz, 1H), 4.09 (bs, 2H, H-6), 3.88 (bd, ; *J* ~ 9.9 Hz, 1H, H-5), 2.01 (bs, 3H, Ac), 1.96 (bs, 3H, Ac), 1.80 (bs, 3H), 0.58 (bs, ~3H, TMS)

Figure S29. COSY spectrum of glycosylation reactions catalyzed by TMSNTf<sub>2</sub> at -55 °C

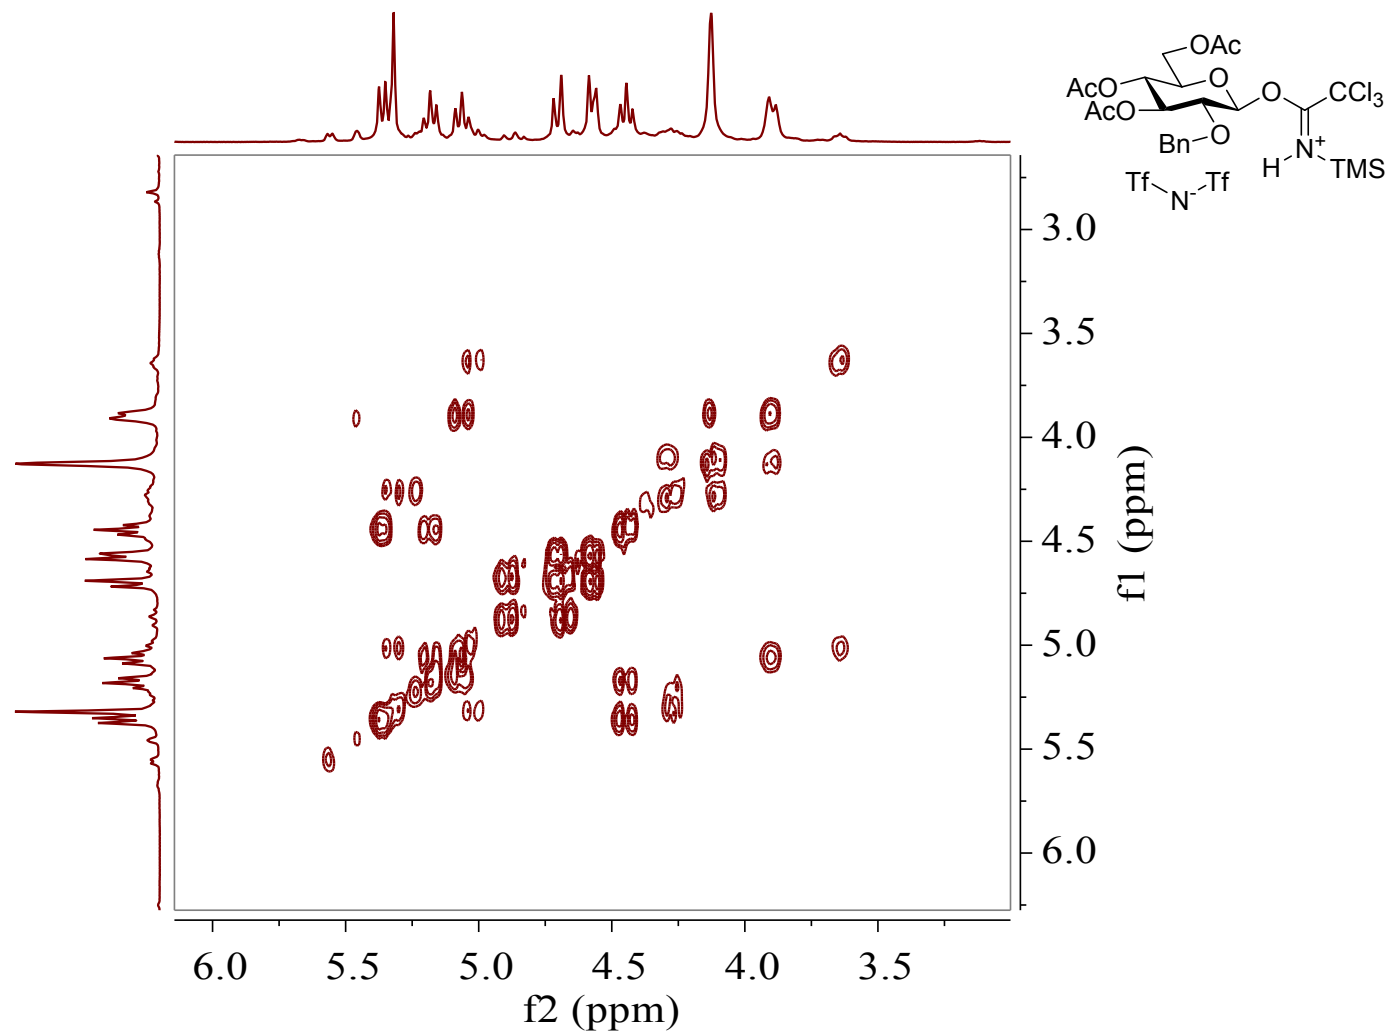

Figure S30. <sup>13</sup>C DEPT135 spectrum of glycosylation reactions catalyzed by TMSNTf<sub>2</sub> at -55 °C

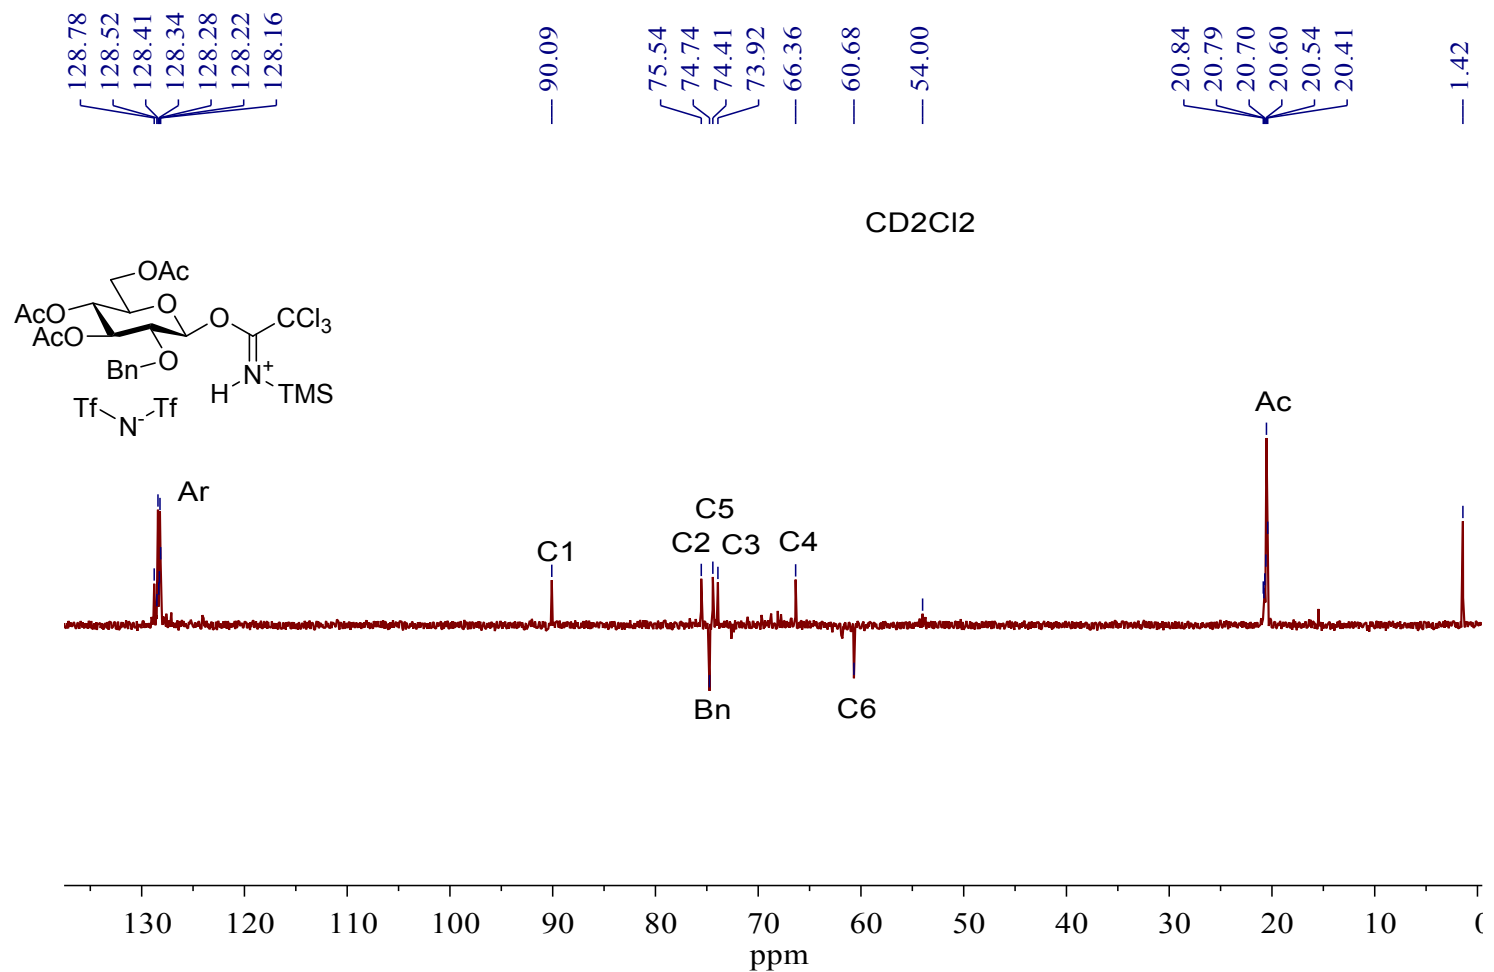

<sup>13</sup>C NMR (100 MHz, Methylene Chloride-*d*<sub>2</sub>) δ 90.1 (C1), 75.5(C2), 74.7(Bn), 74.4(C5), 73.9(C3), 66.4(C4), 60.7(C6)



Figure S32.  $^{19}\text{F}$  NMR spectrum of glycosylation reactions catalyzed by  $\text{TMSNTf}_2$  at  $-55\text{ }^\circ\text{C}$

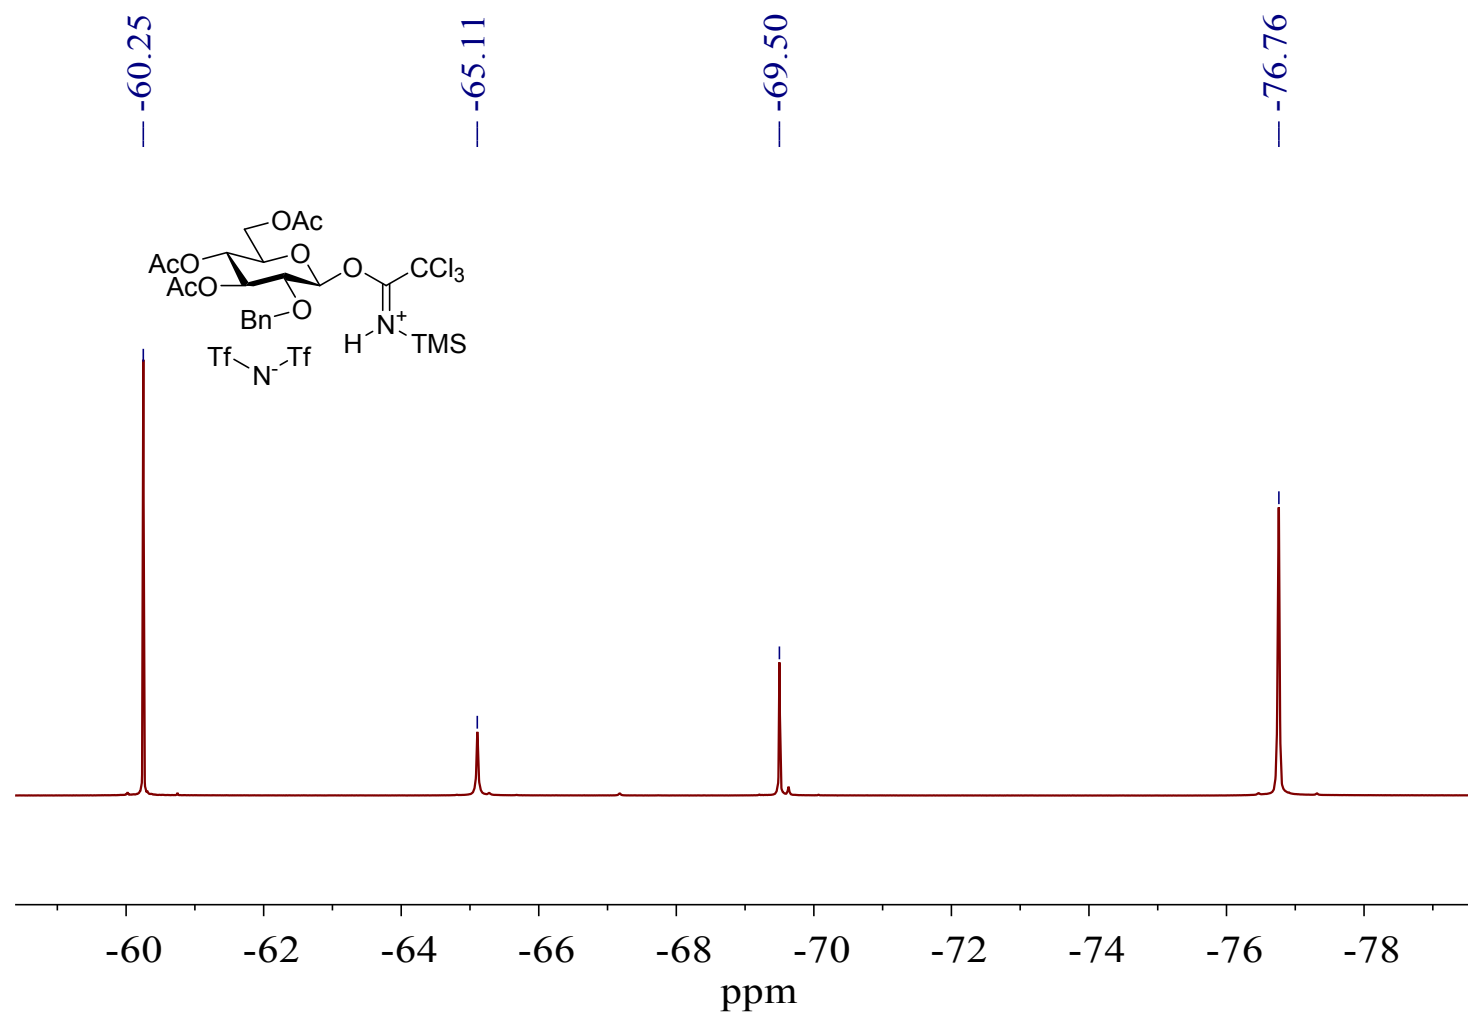

Figure S33. NOESY spectrum of glycosylation reactions catalyzed by TMSNTf<sub>2</sub> at -55 °C

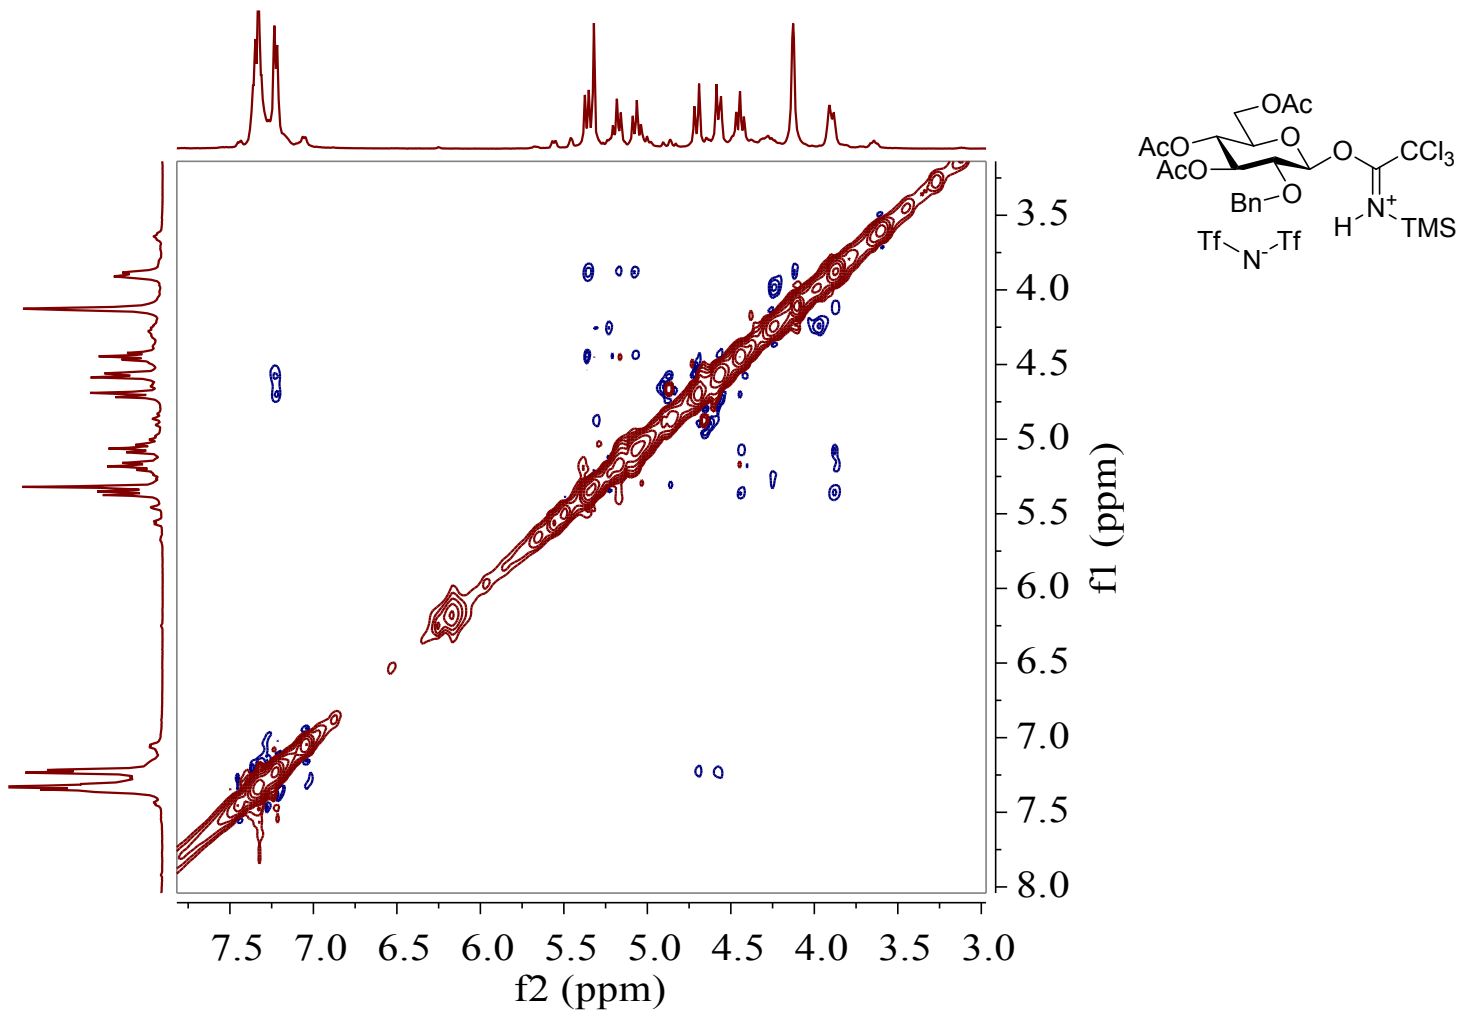



Figure S34.  $^1\text{H}$  DOSY and  $^{19}\text{F}$  DOSY spectra of glycosylation reactions catalyzed by  $\text{TMSNTf}_2$

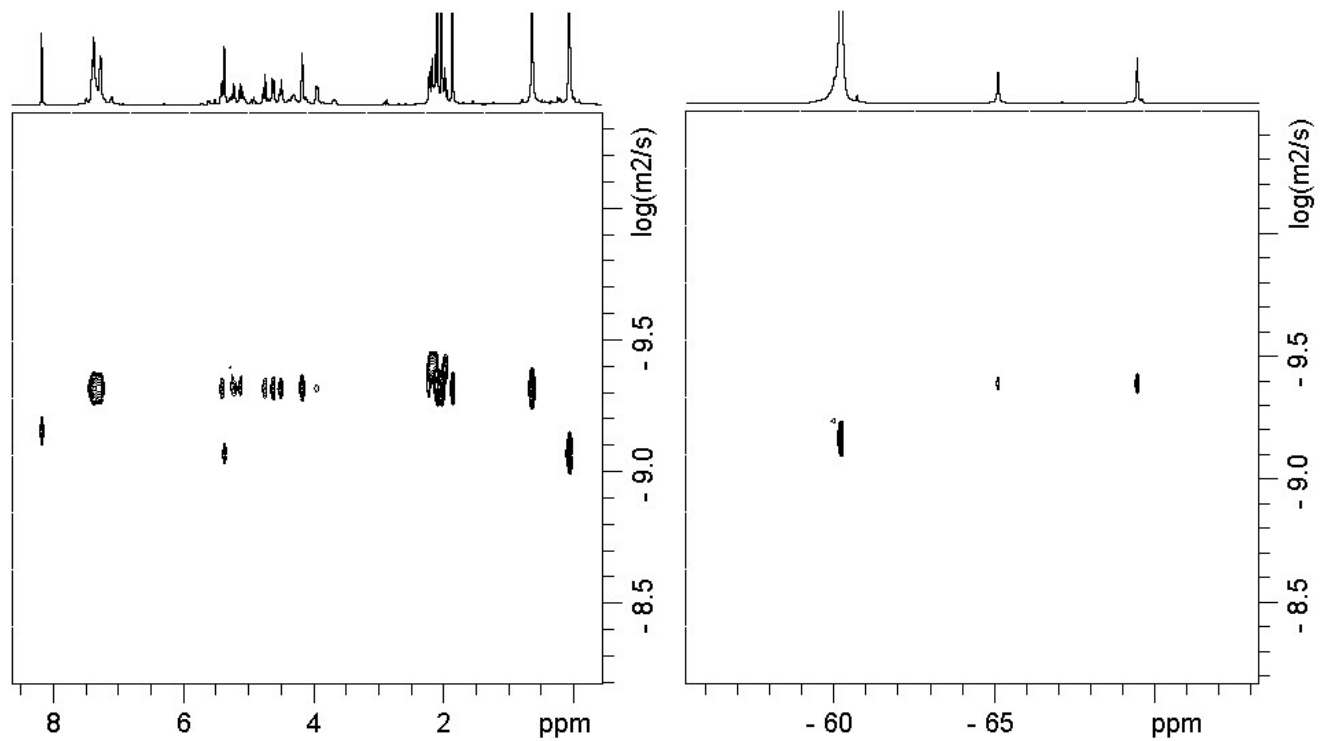

Figure S35.  $^{19}\text{F}$  NMR spectra of glycosylation reactions catalyzed by  $\text{TMSNTf}_2$  from  $-55\text{ }^\circ\text{C}$  to  $15\text{ }^\circ\text{C}$

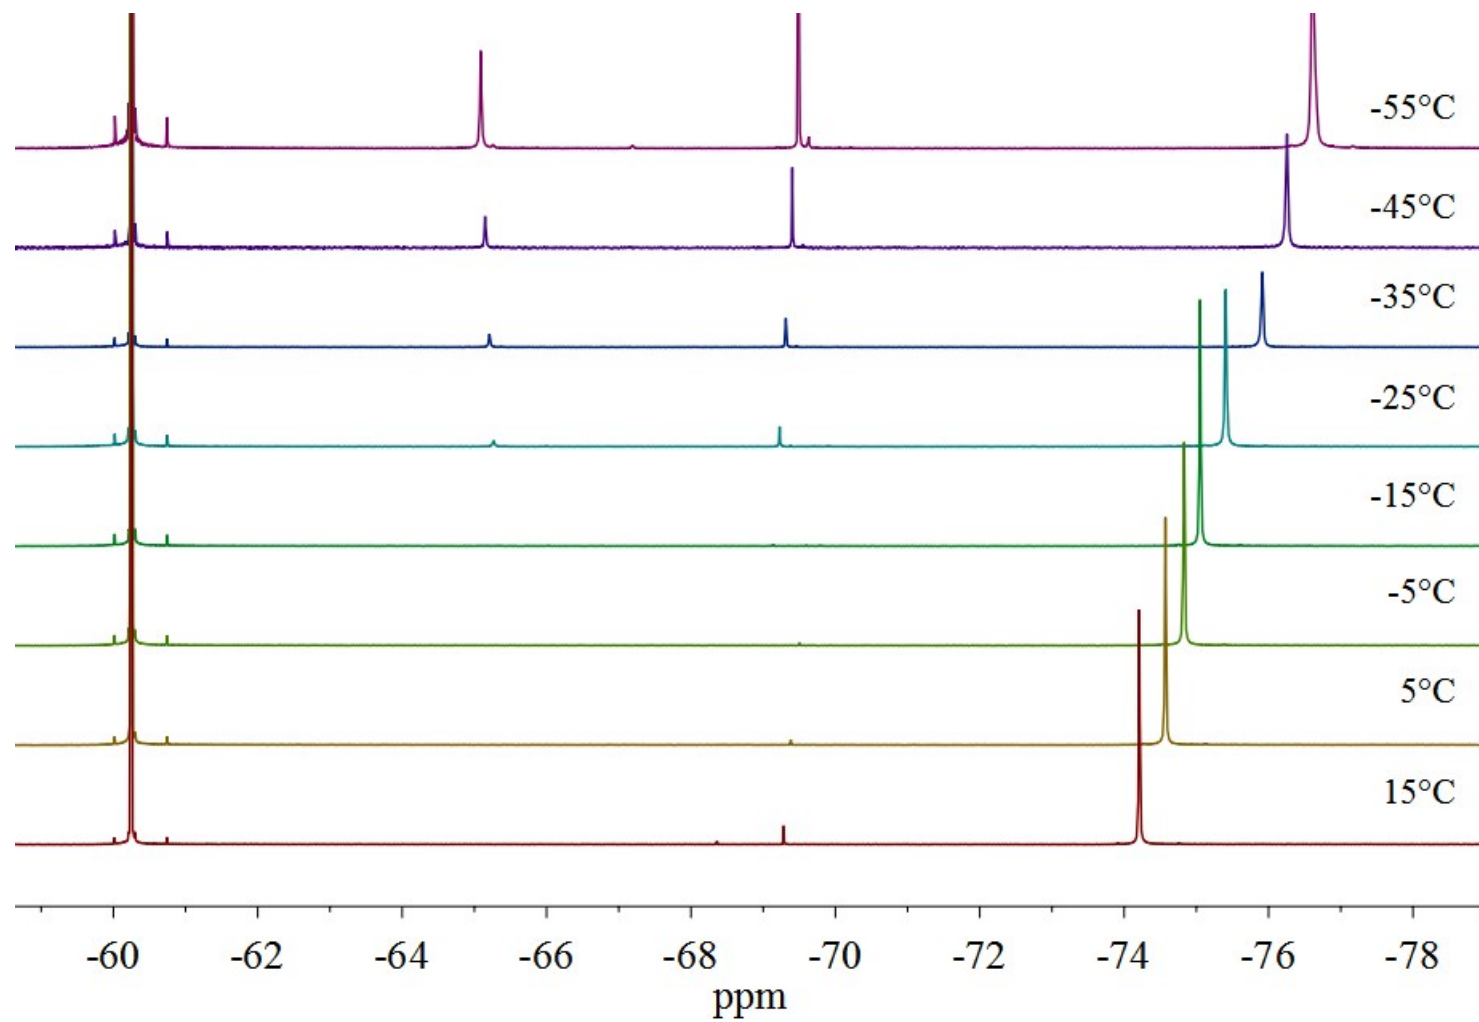

Figure S36. COSY spectrum of glycosylation reactions catalyzed by TMSNTf<sub>2</sub> at -5 °C

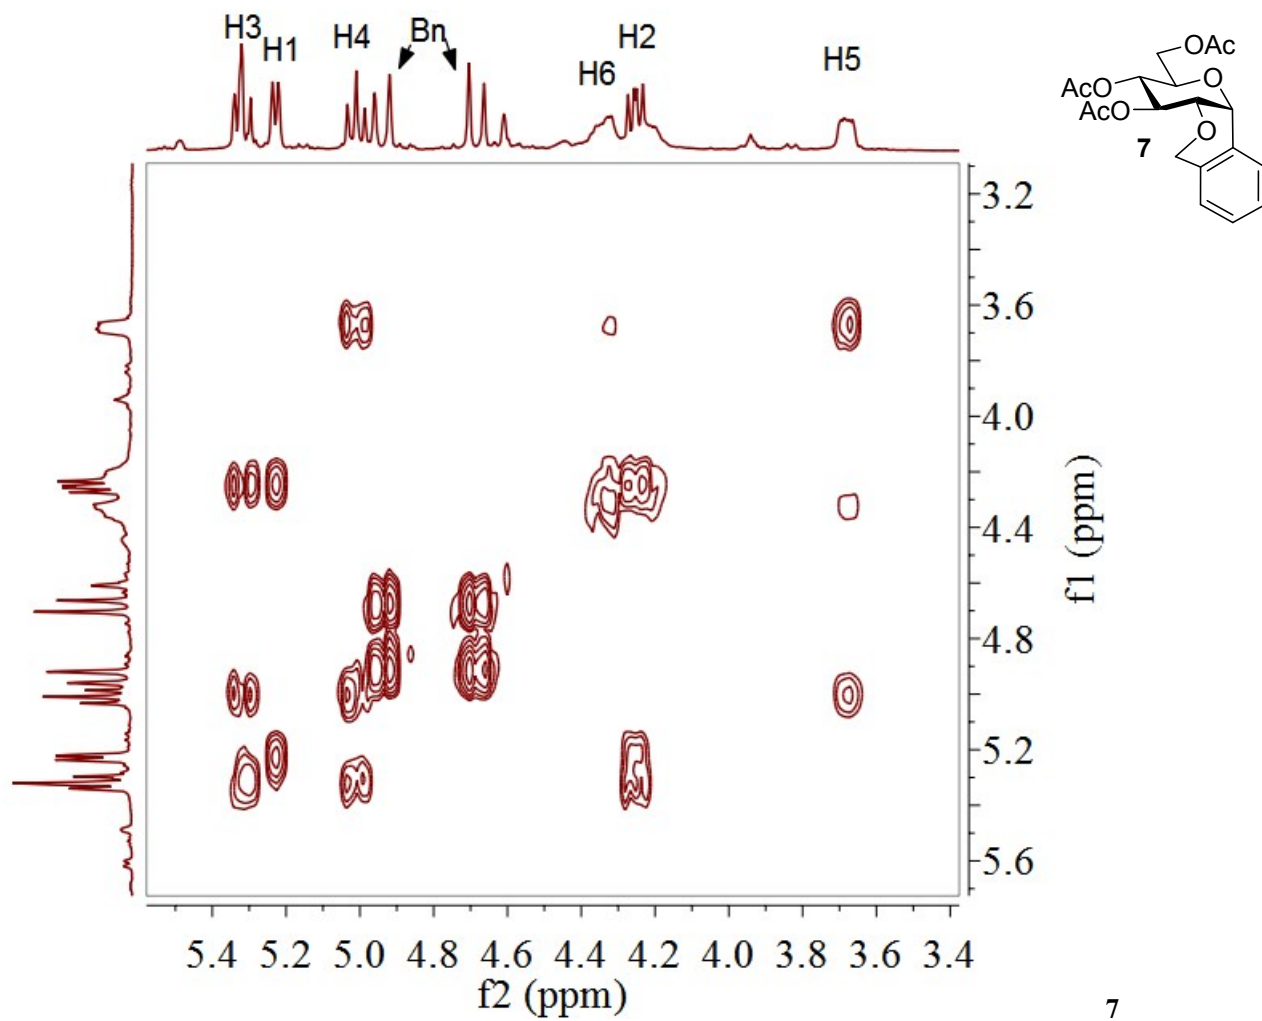

Figure S37.  $^{13}\text{C}$  NMR spectrum of glycosylation reactions catalyzed by  $\text{TMSNTf}_2$  at  $-5\text{ }^\circ\text{C}$

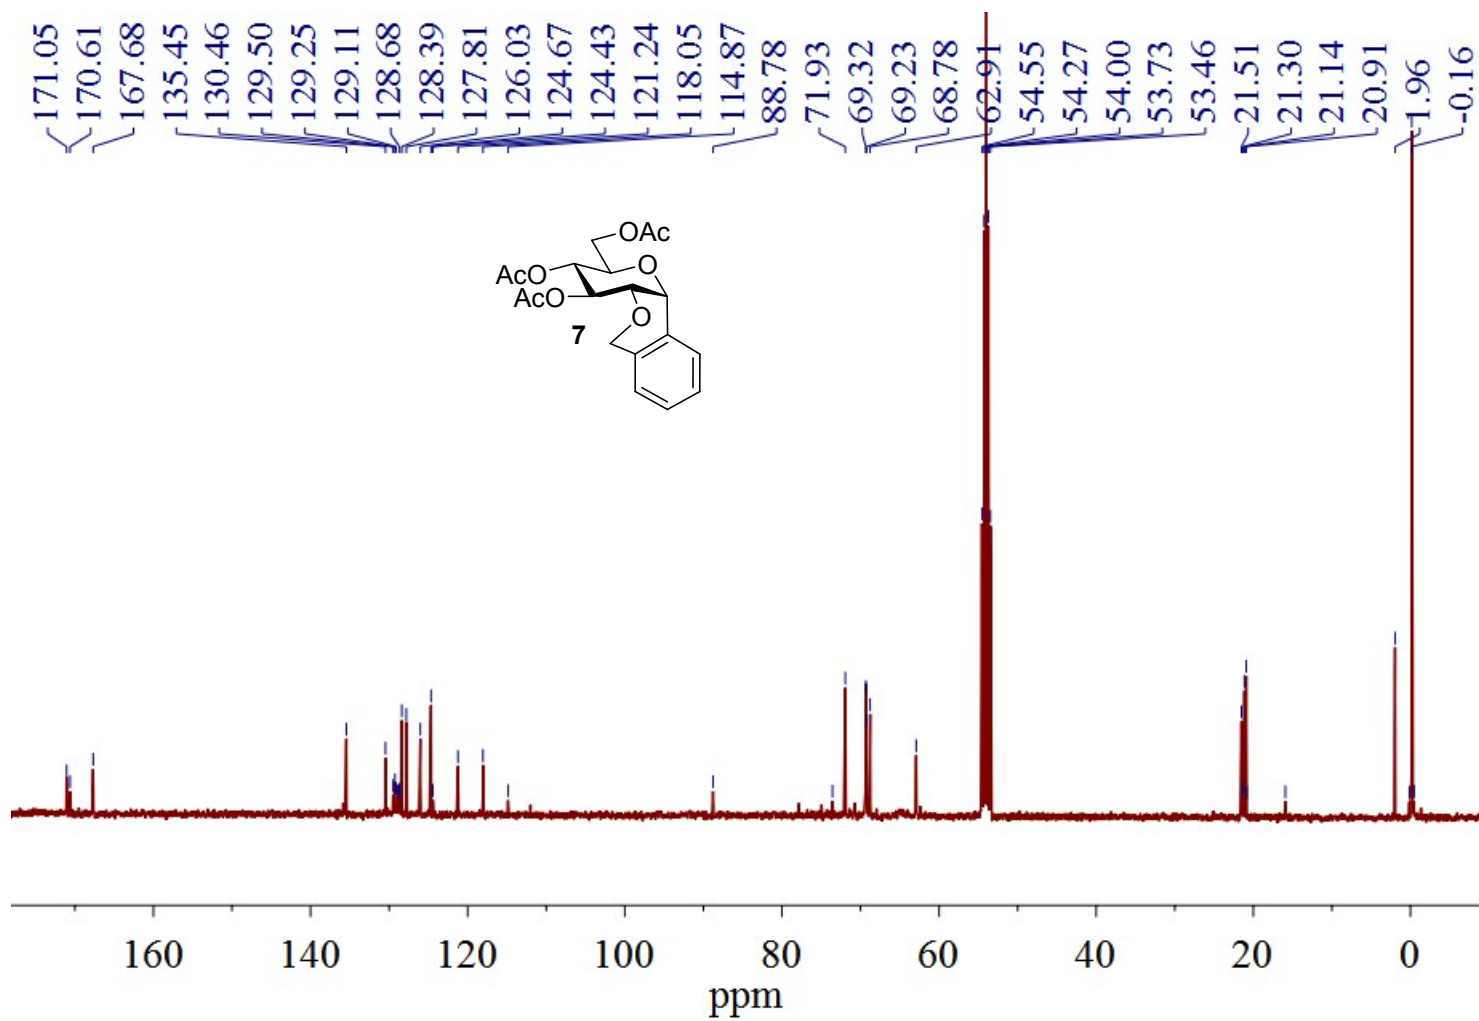

Figure S38. HSQC spectrum of glycosylation reactions catalyzed by TMSNTf<sub>2</sub> at -5 °C

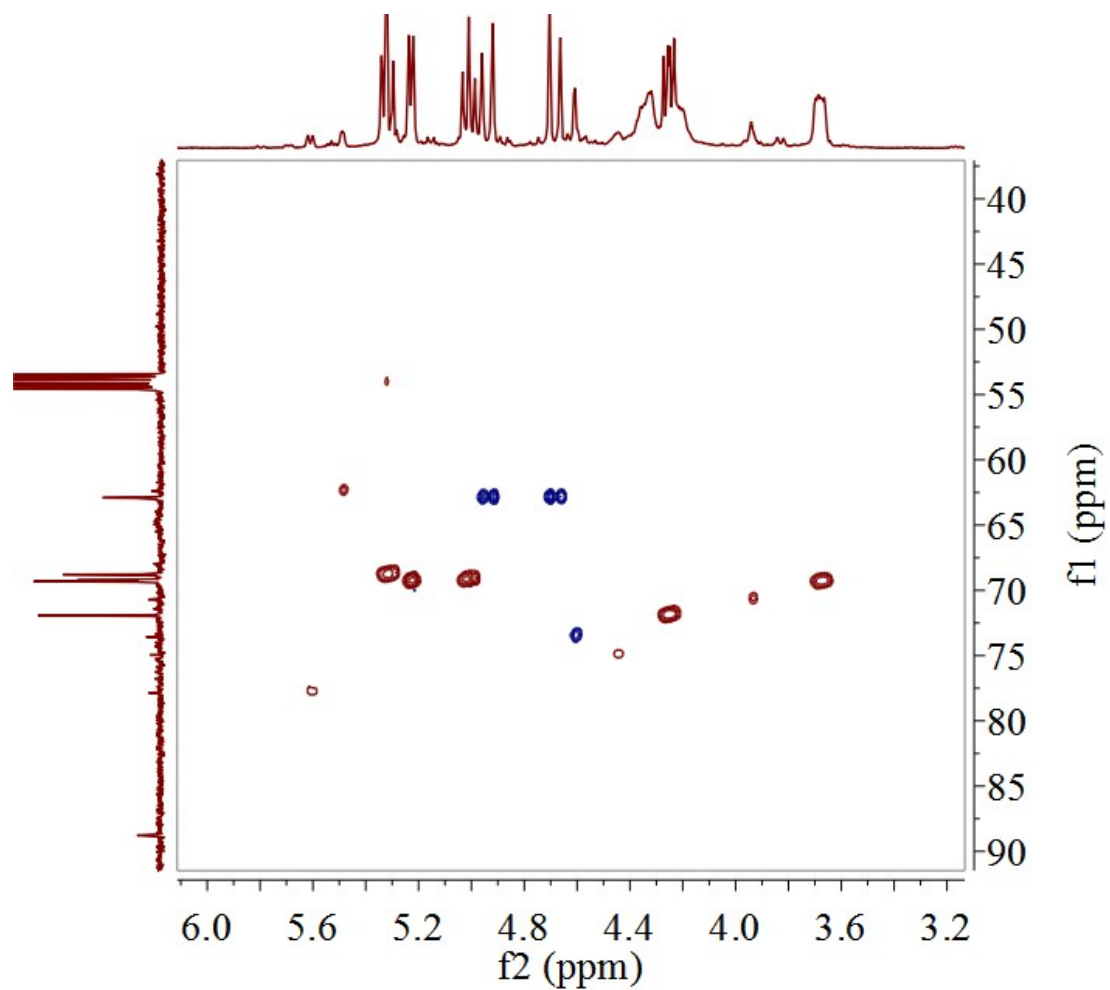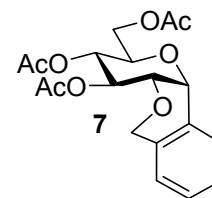

HRMS: Calculated for C<sub>19</sub>H<sub>22</sub>O<sub>8</sub>Na: 401.1253 found: 401.1253

## 6. Molecular Weight Determination of the intermediates via DOSY by using External Calibration Curves

Figure S39. Overview of the used compounds (S1-S8) for calibration curves and the internal reference.

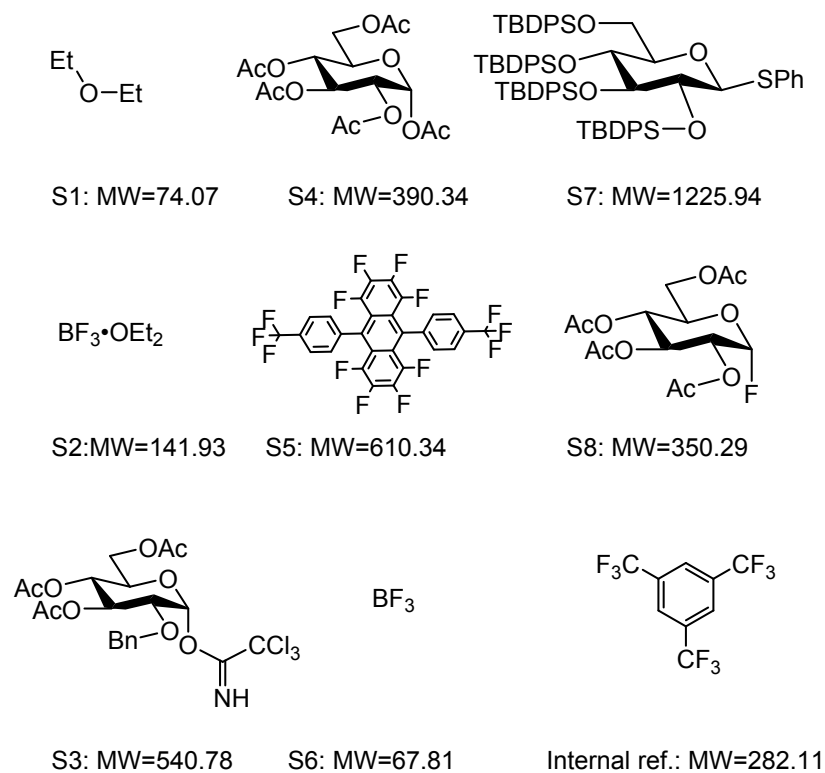

Table S1. The compounds for calibration curves by  $^1\text{H}$  DOSY NMR and their normalized diffusion coefficients  $\log D_{x,\text{norm}}$

| Analyte | $\log MW$ | $\log D_{\text{ref}}$ | $\log D_x$ | $\log D_{x,\text{norm}}$ | error    |
|---------|-----------|-----------------------|------------|--------------------------|----------|
| S1      | 1.8699    | -9.0580               | -9.0269    | -9.1225                  | 1.37E-02 |
| S2      | 2.1521    | -9.0580               | -9.0872    | -9.1829                  | 1.87E-02 |
| S3      | 2.5914    | -9.1073               | -9.2343    | -9.2806                  | 2.23E-02 |
| S4      | 2.7330    | -9.1284               | -9.2790    | -9.3043                  | 2.26E-02 |
| S5      | 2.7856    | -9.2823               | -9.4510    | -9.3223                  | 1.74E-02 |
| S7      | 3.0885    | -9.2328               | -9.4685    | -9.3893                  | 3.25E-02 |

$\log D_{x,\text{norm}} = \log D_{\text{ref,fix}} - \log D_{\text{ref}} + \log D_x$ ; the 1,3,5-tris(trifluoromethyl)benzene was used as the internal reference with  $\log D_{\text{ref,fix}} = -9.1573$ . All compounds have been measured in 0.04 M solutions of analyte and 1,3,5-tris(trifluoromethyl)benzene in an equimolar ratio.

Table S2. The compounds for calibration curves by  $^{19}\text{F}$  DOSY NMR and their normalized diffusion coefficients  $\log D_{x,\text{norm}}$ ,

| Analyte | $\log MW$ | $\log D_{\text{ref}}$ | $\log D_x$ | $\log D_{x,\text{norm}}$ | error    |
|---------|-----------|-----------------------|------------|--------------------------|----------|
| S6      | 1.8313    | -9.1878               | -9.1296    | -9.0955                  | 7.17E-03 |
| S2      | 2.1521    | -9.1878               | -9.2161    | -9.1820                  | 1.78E-02 |
| S8      | 2.5444    | -9.1643               | -9.2725    | -9.2618                  | 2.58E-02 |
| S5      | 2.7856    | -9.3170               | -9.5072    | -9.3439                  | 1.26E-02 |

$\log D_{x,\text{norm}} = \log D_{\text{ref, fix}} - \log D_{\text{ref}} + \log D_x$ ; the 1,3,5-tris(trifluoromethyl)benzene was used as the internal reference with  $\log D_{\text{ref,fix}} = -9.1573$ . All compounds have been measured in 0.04 M solutions of analyte and 1,3,5-tris(trifluoromethyl)benzene in an equimolar ratio.



Figure S40.  $\log D$  versus  $\log MW$  in  $CD_2Cl_2$  by  $^1H$  DOSY NMR. All compounds were normalized to  $\log D_{ref,fix} = -9.1537$ .

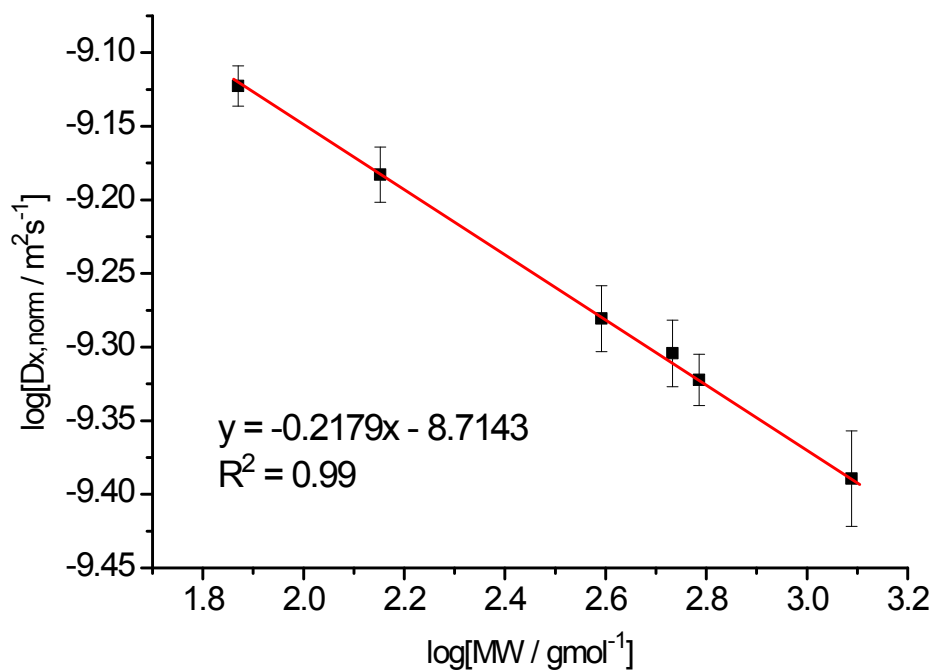

Figure S41.  $\log D$  versus  $\log MW$  in  $CD_2Cl_2$  by  $^{19}F$  DOSY NMR. All compounds were normalized to  $\log D_{ref,fix} = -9.1537$ .

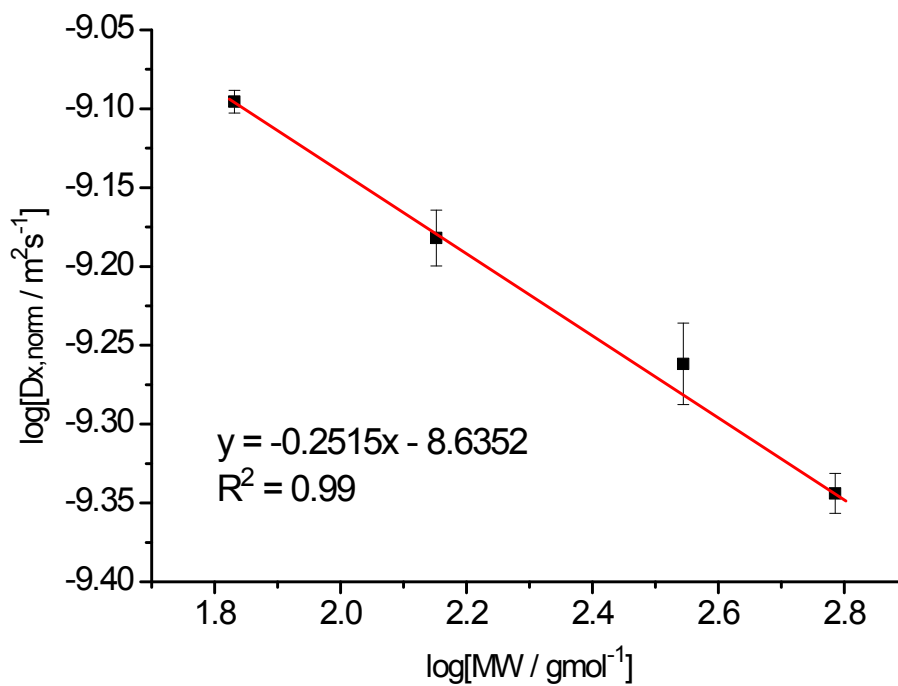

---

<sup>1</sup> N.J. Davis, S.L. Flitsch *J. Chem. Soc. Perkin Trans 1*, **1994**, 359-368; N.C.R. van Straten, G.A. van der Marel, J.H. van Boom *Tetrahedron*, **1997**, *53*, 6523-6538

<sup>2</sup> D. Naumann, J. Kischkewitz, *J. Fluorine Chem.* **1990**, *47*, 283-299
